# Supplementary material
Source: publisher figshare collection journal article supplement (https://sage.figshare.com/articles/dataset/_/8311439)
Supplement: Supplementary file 1 [file 15572684]

**Submission to: The International Journal of Stroke**

Submission Type: Lignes directrices de pratique clinique

Submission Date: March 15, 2019

**Title:** Recommandations canadiennes pour les pratiques optimales de soins de l'AVC : Humeur, cognition et fatigue après un AVC, sixième édition, mise à jour 2019

**Recommandations canadiennes pour les pratiques optimales de soins de l'AVC : lignes directrices de pratique clinique sur l'humeur, la cognition et la fatigue après un AVC (édition 2019)**

**Authors:**

Krista L Lanctôt (First Author),<sup>1,2</sup> M Patrice Lindsay (Corresponding Author)<sup>3</sup>, Eric E. Smith<sup>4,5</sup>, Demetrios J Sahlas<sup>6</sup>, Norine Foley<sup>7</sup>, Gord Gubitz<sup>8,9,10</sup>, Melissa Austin<sup>11</sup>, Kristyn Ball<sup>12</sup>, Sanjit Bhogal<sup>7</sup>, Treena Blake<sup>13</sup>, Nathan Herrmann<sup>1,2</sup>, David Hogan<sup>14</sup>, Aisha Khan<sup>15</sup>, Stewart Longman<sup>16</sup>, Andrea King<sup>17</sup>, Carol Leonard<sup>18</sup>, Tricia Shoniker<sup>19</sup>, Trudy Taylor<sup>20</sup>, Moira Teed<sup>3</sup>, Andrea de Jong<sup>3</sup>, Anita Mountain<sup>21,22</sup>, Leanne K. Casaubon<sup>2,10,23</sup>, Dar Dowlathshahi<sup>24</sup>, and Richard H. Swartz (Senior Author)<sup>1,2</sup>, on behalf of the Management of Mood, Cognition and Fatigue Following Stroke Best Practice Writing Group, the Heart & Stroke Canadian Stroke Best Practices and Quality Advisory Committee; in collaboration with the Canadian Stroke Consortium.

**Affiliations:**

1. Sunnybrook Research Institute, Toronto, Ontario; 2. University of Toronto Faculty of Medicine, Toronto, Ontario; 3. Heart and Stroke Foundation of Canada, Toronto, Ontario; 4. Calgary Stroke Program, Calgary Alberta; 5. Hotchkiss Brain Institute, University of Calgary Cumming School of Medicine, Calgary, Alberta; 6. Division of Neurology, Department of Medicine, Faculty of Health Sciences, McMaster University; 7. workHORSE Consulting Services, London, Ontario; 8. Queen Elizabeth II Health Sciences Centre, Halifax, Nova Scotia; 9. Dalhousie University Department of Medicine (Neurology), Halifax Nova Scotia; 10. Canadian Stroke Consortium; 11. Department of Occupational Science and Occupational Therapy, Faculty of Medicine, University of British Columbia; 12. Health Sciences Centre, Winnipeg, Manitoba; 13. GF Strong Rehabilitation Centre, Vancouver, British Columbia; 14. University of Calgary Cumming School of Medicine, Calgary, Alberta; 15. Montreal University Health Center, Montreal, Quebec; 16. Calgary Stroke Program, Alberta Health Services, Calgary, Alberta; 17. Nova Scotia Health Authority; 18. Audiology and Speech-Language Pathology Program, University of Ottawa; 19. Parkwood Institute, London, Ontario; 20. Carewest Dr. Vernon Fanning Centre, Calgary, Alberta; 21. Dalhousie University Division of Physical Medicine and Rehabilitation, Halifax, Nova Scotia; 22. Nova Scotia Rehabilitation Centre Site, Halifax, Nova Scotia; 23. University Health Network, Toronto Western Hospital, Toronto, Ontario; 24. University of Ottawa Faculty of Medicine, Ottawa, Ontario.

## Contributions

Krista L. Lanctôt (auteure principale) et Richard H. Swartz (auteur en chef) sont les coprésidents du groupe de rédaction regroupant des experts de la gestion de l'humeur, de la cognition et de la fatigue après un AVC et, à titre d'auteurs principaux, contribuent à tous les aspects de la conception, de l'analyse des données, de l'écriture, de la révision et de l'approbation finale du présent manuscrit; Patrice Lindsay est l'auteure-ressource et l'éditrice en chef des lignes directrices et du présent manuscrit, et participe à toutes les étapes de l'analyse de la littérature scientifique, des délibérations du groupe de rédaction, du processus d'examen externe et de la préparation du manuscrit, en plus d'écrire des documents complémentaires. Demetrios J. Sahlas, Melissa Austin, Kristyn Ball, Treena Blake, Nathan Herrmann, David Hogan, Aisha Khan, Stewart Longman, Andrea King, Carol Leonard, Tricia Shoniker, Trudy Taylor et Moira Teed sont tous des membres du groupe d'experts de rédaction sur la gestion de l'humeur, de la cognition et de la fatigue après un AVC et ont contribué à l'examen et à l'analyse des données probantes ainsi qu'au peaufinage des recommandations du présent manuscrit. Andrea de Jong a participé au processus d'examen externe et aux révisions finales des lignes directrices et du manuscrit. Gord Gubitz et Eric E. Smith, les principaux conseillers du groupe de rédaction, ont grandement contribué à l'élaboration de la méthodologie et des recommandations, en plus de relire et de rectifier l'ensemble des documents. Norine Foley et Sanjit Bhogal ont recueilli les données probantes et en ont fait des tableaux et des résumés pour venir soutenir la réédition des lignes directrices; elles ont également contribué à la rédaction du présent manuscrit. Leanne Casaubon, Anita Mountain et Dar Dowlatshahi sont des dirigeants du Comité consultatif canadien sur la qualité des soins de l'AVC; ils ont participé à l'élaboration des recommandations, ont révisé le manuscrit et ont fourni une rétroaction.

Mots clés : AVC, accident ischémique transitoire, dépression, déficit cognitif d'origine vasculaire, fatigue, lignes directrices

Nombre de mots total du manuscrit : 14 854, excluant les références et les déclarations

Nombre de mots du résumé : 365 mots

Tables:            Figures: 0

### Corresponding Author:

M. Patrice Lindsay, RN, PhD  
Director, Systems Change and Stroke Program,  
Senior Editor, Canadian Stroke Best Practice Recommendations  
Heart and Stroke Foundation of Canada

2300 Yonge Street, Suite 1300  
P.O. Box 2414,  
Toronto Ontario, Canada M4P 1E4  
Ph: +1-647-943-3042  
[patrice.lindsay@heartandstroke.ca](mailto:patrice.lindsay@heartandstroke.ca)

## RÉSUMÉ

L'édition 2019 des *Recommandations canadiennes pour les pratiques optimales de soins de l'AVC : humeur, cognition et fatigue après un AVC* est un ensemble complet de lignes directrices fondées sur des données probantes, qui traitent de trois problèmes importants pouvant avoir des conséquences négatives sur la vie des personnes qui ont été victimes d'un AVC : la dépression et l'anxiété après un AVC, les déficits cognitifs d'origine vasculaire et la fatigue après un AVC. Environ 20 à 50 % des personnes ayant subi un AVC seront touchées par au moins un de ces problèmes de santé. Ces problèmes peuvent également apparaître simultanément, en particulier dans le cas de la fatigue et de la dépression. S'ils ne sont pas cernés et traités à temps, ils peuvent s'aggraver au fil du temps et entraîner des problèmes plus graves. Cette nouvelle édition des *Recommandations canadiennes pour les pratiques optimales de soins de l'AVC* a pour thème les partenariats et collaborations, et met l'accent sur l'importance de l'intégration et de la coordination au sein du système de santé afin d'assurer la prestation de soins sans failles en temps opportun pour les personnes ayant subi un AVC et ainsi favoriser leur rétablissement et leur évolution. Ainsi, les recommandations qui s'y trouvent soulignent fortement l'importance d'effectuer un test de dépistage et une évaluation en temps opportun, de même que de commencer des traitements adéquats à temps au sein des différents milieux de soins. Idéalement, lorsque le dépistage indique un problème d'humeur ou de cognition, les patients et leur famille doivent être orientés vers des professionnels de la santé ayant une expertise en la matière pour se soumettre à une évaluation approfondie. Au fur et à mesure que la complexité des cas de patients traités pour un AVC augmente, la continuité des soins et une excellente communication entre les professionnels de la santé, ainsi qu'entre les membres de l'équipe de soins de santé et le patient et sa famille, revêtent une importance encore plus grande, comme on l'a souligné tout au long des recommandations, car elles sont essentielles pour assurer des transitions sans failles entre les soins de courte durée et la réadaptation du patient ainsi que sa réintégration dans la communauté.

**Titre :       Recommandations canadiennes pour les pratiques optimales de soins de l'AVC : lignes directrices de pratique clinique sur l'humeur, la cognition et la fatigue après un AVC (édition 2019)**

## **Introduction**

À l'échelle mondiale, l'AVC arrive au second rang parmi les causes de décès les plus courantes (11,8 %) après la cardiopathie ischémique (14,8 %)¹. Au Canada, environ 62 000 personnes victimes d'un AVC ou d'un accident ischémique transitoire (AIT) sont traitées chaque année dans des hôpitaux du pays, ce qui représente un patient à toutes les neuf minutes². Cette statistique ne compte pas les neuf AVC « silencieux » qu'on estime pour chaque AVC symptomatique, qui se traduisent souvent par des variations subtiles de l'humeur et des changements cognitifs mineurs³. Grâce aux progrès réalisés dans les soins de l'AVC en phase aiguë et dans la prise en charge rapide des patients à l'hôpital, le taux de mortalité attribuable à un AVC est en déclin. Bien qu'il faille souligner ces réussites, l'AVC demeure l'une des principales causes d'incapacité chez les adultes – environ 400 000 Canadiens et Canadiennes vivent avec les séquelles d'un AVC⁴. L'accès à des services de réadaptation en milieu hospitalier varie de région en région, mais seulement 19 % des patients y ayant accès proviennent des soins de l'AVC en phase aiguë. On remarque également des écarts en ce qui concerne la disponibilité des services spécialisés à l'extérieur des grands centres urbains.

Les conséquences les plus courantes de l'AVC, comme la dépression et l'anxiété après un AVC, un déficit cognitif d'origine vasculaire et la fatigue après un AVC, posent des défis qui peuvent nuire au rétablissement et entraîner des séquelles fonctionnelles importantes ainsi qu'une réduction de la qualité de vie. De 20 à 50 % des personnes ayant subi un AVC seront touchées par au moins un de ces problèmes de santé⁵-7. Certains de ces problèmes peuvent apparaître simultanément, augmentant du même coup la complexité du diagnostic et du traitement approprié. Il a été démontré que la fatigue et les symptômes dépressifs coexistent chez jusqu'à 30 % des survivants d'AVC, mais ces problèmes peuvent aussi être associés à des troubles cognitifs et moteurs⁸. Selon une méta-analyse regroupant les résultats de 57 études, la prévalence de dépression chez les personnes ayant un léger trouble cognitif dans la population globale atteint 32 %⁹. Chez les personnes souffrant de dépression, un léger trouble cognitif peut évoluer plus rapidement en démence¹⁰. Ces problèmes ont tous le potentiel de retarder ou de gêner le rétablissement, ce qui peut entraîner des séquelles importantes¹¹-13. Malheureusement, ces problèmes ne sont pas évidents à remarquer par la personne qui a subi l'AVC, par les professionnels de la santé ou par les aidants naturels, en particulier si les symptômes sont légers ou s'ils se manifestent lentement et progressivement, ou s'ils n'apparaissent que plus tard au cours du processus de rétablissement, lorsque les soins deviennent plus espacés dans la communauté. De plus, des rapports récents sur la qualité des services de soins de l'AVC dans l'ensemble du Canada ont révélé que le dépistage et la surveillance des problèmes de dépression, de fatigue et de fonction cognitive d'origine vasculaire chez les patients après un AVC n'étaient effectués que dans un peu plus de 50 %

des cas des personnes traitées en cliniques de prévention de l'AVC à la suite d'un AVC ou d'un accident ischémique transitoire (AIT)<sup>14</sup>. Par conséquent, ces problèmes peuvent passer inaperçus et ne pas être traités à temps; dépassés par la situation, les patients et leur famille naviguent à l'aveuglette au sein du système de santé. Cette problématique souligne une fois de plus la nécessité d'avoir un système de santé normalisé pour bien traiter ces problèmes dans le continuum de soins<sup>15</sup>.

L'édition 2019 des *Recommandations canadiennes pour les pratiques optimales de soins de l'AVC : humeur, cognition et fatigue après un AVC* propose un résumé exhaustif des recommandations actuelles fondées sur des données probantes, en s'attardant surtout sur la prise en charge des personnes qui ont déjà subi un AVC ou un AIT. Cette nouvelle édition des *Recommandations canadiennes pour les pratiques optimales de soins de l'AVC* a pour thème les partenariats et collaborations, et met l'accent sur l'importance de l'intégration et de la coordination au sein du système de santé afin d'assurer la prestation de soins sans failles en temps opportun pour les personnes ayant subi un AVC et ainsi favoriser leur rétablissement et leur évolution. Ces lignes directrices mettent en lumière l'importance d'adopter une approche multidisciplinaire coordonnée et organisée pour guider le dépistage, l'évaluation et les décisions en matière de prise en charge par les cliniciens de différents milieux de soins qui traitent des personnes ayant subi un AVC ou leur famille.

### **Quoi de neuf en 2019?**

Dans les domaines où les données probantes sont insuffisantes, une nouvelle section appelée « Considérations cliniques » a été ajoutée; elle contient des recommandations basées sur des données moins probantes ou des pratiques fondées sur un consensus d'experts. Dans la section sur la dépression, de nouvelles données suggèrent que les antidépresseurs prophylactiques peuvent être efficaces chez certains patients ayant subi un AVC. Il existe un nouvel agent thérapeutique, l'Actogevin, qui améliore le métabolisme oxydatif dans le cerveau et qui pourrait contribuer au rétablissement de la fonction cognitive après un AVC ischémique. Bien que ce médicament ne soit pas actuellement utilisé en pratique clinique, il est susceptible de devenir de plus en plus répandu. L'édition 2019 contient également un tableau comparatif mis à jour des outils d'évaluation pour le dépistage des déficits cognitifs d'origine vasculaire ainsi que de nouvelles informations sur la gestion de la fatigue à la suite d'un AVC.

### **Méthodologie d'élaboration des lignes directrices**

Le processus d'élaboration et de mise à jour des *Recommandations canadiennes pour les pratiques optimales de soins de l'AVC* respecte un cadre de travail rigoureux, adapté de l'outil Practice Guideline Evaluation and Adaptation Cycle<sup>16, 17</sup>. La même méthodologie a été utilisée pour les dernières éditions des *Recommandations*<sup>18, 19</sup>; elle est disponible sur le site Web des pratiques optimales de l'AVC au Canada à <https://www.pratiquesoptimalesavc.ca/>. Un groupe

interdisciplinaire d'experts dans les domaines de la dépression, de l'anxiété, de la cognition et de la fatigue a été formé pour contribuer à l'examen, à la rédaction et à la révision de tous les énoncés des recommandations. Les membres choisis pour former ce groupe sont considérés comme des experts dans leur domaine, ont mené des essais cliniques sur les sujets abordés dans le présent module et ont publié de nombreux articles à cet effet. Le groupe de rédaction comprend des neurologues spécialisés en AVC, un gérontopsychiatre, un pharmacologue clinicien, des neuropsychologues, des ergothérapeutes, un orthophoniste, un médecin de famille, des infirmiers, des personnes qui ont subi un AVC et des experts en méthodologie fondée sur des données probantes. L'approche interdisciplinaire a permis de tenir compte de tous les points de vue lors de la rédaction des recommandations, tout en réduisant les risques de conflits d'intérêts (réels ou potentiels) chez les membres.

Une recherche bibliographique systématique a été menée par du personnel expérimenté en vue d'obtenir des données probantes pour chacun des sujets couverts dans le module *Humeur, cognition et fatigue après un AVC*. La littérature pour ce module a été mise à jour en février 2019. Le groupe de rédaction a obtenu des tableaux de données probantes exhaustifs qui comprenaient notamment des sommaires de toutes les études de haute qualité repérées lors des recherches bibliographiques (les tableaux de données probantes sont accessibles à l'adresse <https://www.pratiquesoptimalesavc.ca>). Des méta-analyses, des examens systématiques, des essais contrôlés randomisés et des études d'observation ont été inclus lorsqu'ils étaient disponibles. Le groupe de rédaction a discuté de la valeur des données probantes et, par consensus, a élaboré une série de recommandations proposées. Dans le cadre de ces discussions, d'autres résultats de recherche ont pu être repérés et intégrés aux tableaux de données probantes à l'obtention d'un consensus sur la valeur de la recherche.

Toutes les recommandations ont reçu un niveau de données probantes ou preuve, allant de A à C, selon les critères définis dans le tableau 1. Dans le cadre de l'élaboration et de l'inclusion des recommandations de niveau C, un consensus a été obtenu au sein du groupe de rédaction et validé par un processus d'examen interne et externe. Ce niveau de données probantes a été utilisé avec précaution, et seulement en l'absence de preuves plus solides pour des thèmes qui sont considérés comme d'importants moteurs du système des soins de l'AVC (p. ex., les problèmes concernant le dépistage et l'évaluation). Dans certaines sections, le groupe de rédaction a jugé que d'autres informations devaient être ajoutées. Même si ces énoncés n'ont pas respecté les critères nécessaires pour faire office de recommandations officielles, ils ont été inclus à titre de « considérations cliniques » dans le but d'offrir une orientation ou une clarification supplémentaire en l'absence de données probantes.

Une fois l'ébauche des recommandations terminée, elle a été soumise à un examen interne mené par le Comité consultatif canadien sur les pratiques optimales en matière d'AVC, puis à un examen externe par plusieurs experts du Canada et de l'étranger qui n'avaient pas participé à l'un ou l'autre des aspects de la rédaction des lignes directrices. Toute rétroaction reçue a été examinée avec attention au cours du processus de révision. De plus, toutes les recommandations sont accompagnées de cinq sections d'information d'appoint : la justification

(le bien-fondé de l'inclusion des sujets), les implications pour le système (dans le but de s'assurer que les éléments structurels et les ressources suffisent pour atteindre les niveaux de soins recommandés), les indicateurs de rendement (pour surveiller la prestation des soins et l'évolution des patients), une liste des ressources de mise en œuvre ainsi qu'un résumé des données probantes sur lesquelles les recommandations ont été fondées. Des résumés des données probantes de recherches actuelles sont également fournis au début de chaque section. Des résumés plus détaillés, des liens vers les tableaux de données probantes et de plus amples renseignements sur l'application des connaissances en ce qui concerne les recommandations émises dans la présente publication sont accessibles à l'adresse suivante : <https://www.pratiquesoptimalesavc.ca>. Pour obtenir une description détaillée de la méthodologie employée aux fins de l'élaboration et de la diffusion des *Recommandations canadiennes pour les pratiques optimales de soins de l'AVC*, veuillez consulter le document sur l'aperçu et la méthodologie des *Recommandations canadiennes pour les pratiques optimales de soins de l'AVC* » au <https://www.pratiquesoptimalesavc.ca>.

## SECTION 1 : RECOMMANDATIONS EN MATIÈRE D'HUMEUR APRÈS UN AVC

La dépression après un AVC est chose courante. L'une des estimations les plus actuelles et complètes, obtenue à partir d'un examen systématique incluant les résultats de 61 études prospectives, suggère qu'environ 30 % de tous les survivants d'AVC ont ressenti des symptômes dépressifs à un moment ou à un autre à la suite de l'AVC<sup>5</sup>. La prévalence de symptômes dépressifs parmi les survivants d'AVC est plus élevée qu'au sein de la population générale. L'estimation obtenue d'une étude faite auprès de la population<sup>20</sup> indiquait que sur une période de plus de deux ans, l'apparition d'un cas de dépression était trois fois plus fréquente (25,4 % contre 7,8 %; rapport de risque ajusté = 4,09; intervalle de confiance à 95 % [4,00 à 4,18]) chez les personnes ayant subi un AVC que chez celles faisant partie d'un large échantillon communautaire du même âge et du même sexe. Les facteurs de risque pour le développement d'une dépression après un AVC comprennent l'âge, le fait de vivre seul, un taux élevé de comorbidité, des antécédents de dépression, le fait d'être une femme, une incapacité physique (score modifié sur l'échelle de rapports = > 2 au congé de l'hôpital), la gravité du premier AVC, la présence d'un déficit cognitif et des antécédents d'AVC<sup>13, 20-22</sup>. La dépression après un AVC a été liée à une augmentation des séquelles fonctionnelles et à un risque accru de mortalité<sup>13, 23</sup>.

Comme la fréquence de l'apparition des symptômes de la dépression est plus élevée au cours de l'année suivant l'AVC<sup>5</sup>, les tests de dépistage épisodiques devaient être effectués durant cette période. Le dépistage peut être fait durant le séjour aux soins actifs, au point de transition vers une unité de réadaptation en milieu hospitalier ou durant la période de réadaptation en milieu hospitalier, après le congé dans la communauté et durant les évaluations de santé de routine. Bien que la dépression puisse être dépistée chez la majorité des patients, elle ne l'est pas chez une minorité appréciable en raison des déficits cognitifs ou de l'état d'inconscience suivant immédiatement l'épisode d'AVC. Selon Karamchandani et coll.<sup>24</sup>, si 70 % des patients

sont admissibles à un dépistage de dépression avant leur sortie de l'hôpital ou leur transfert dans une autre unité, les 30 % restants ne le sont pas en raison d'aphasie, d'un autre problème de santé, des mesures d'hôpital/de confort ou d'une intubation prolongée. Swartz et coll.<sup>11</sup> ont démontré la faisabilité d'utiliser la version à deux questions du Questionnaire sur la santé du patient au cours de la pratique clinique courante en faisant le test auprès de 1 500 patients externes visitant une clinique de prévention de l'AVC. Tous les patients ont été en mesure d'effectuer le dépistage, et 89 % d'entre eux l'ont fait en moins de cinq minutes. Parmi les nombreux outils de dépistage déjà validés, la Center of Epidemiological Studies-Depression Scale (CES-D) [échelle de mesure de la dépression du centre d'études épidémiologiques] à 20 énoncés, la Hamilton Depression Rating Scale (HDRS) [échelle de dépression de Hamilton] à 21 énoncés et le Questionnaire sur la santé du patient à neuf énoncés (PHQ-9) sont parmi les plus performants selon une récente méta-analyse<sup>25</sup>.

La prise d'antidépresseurs est l'élément de base du traitement de la dépression. Il a été observé que ce traitement est associé à une réduction des symptômes dépressifs, une fois le diagnostic établi. Xu et coll.<sup>26</sup> ont comparé 11 essais cliniques randomisés dans une méta-analyse de patients ayant un diagnostic clinique de dépression après un AVC et ont observé que le traitement avec antidépresseurs était associé à une réduction considérable des scores de dépression (différence des moyennes standardisée = -0,96; intervalle de confiance à 95 % [-1,41 à -0,51]; valeur de  $p = < 0,0001$ ) et à une meilleure sensibilité au traitement (risque relatif = 1,36; intervalle de confiance à 95 % [1,01 à 1,83]; valeur de  $p = 0,04$ ). Une revue systématique Cochrane<sup>27</sup> comparant les résultats de 12 essais cliniques randomisés abonde dans le même sens, concluant que les chances de rémission d'une dépression (c'est-à-dire une réduction de  $\geq 50$  % des scores sur l'échelle de dépression) étaient beaucoup plus élevées avec l'aide de la pharmacothérapie, bien que de nombreux effets secondaires aient été signalés. La plupart des agents thérapeutiques évalués dans le cadre de ces études étaient des inhibiteurs sélectifs de la recapture de la sérotonine et, dans une moindre mesure, des antidépresseurs tricycliques. De plus, un traitement plus long s'est révélé plus efficace. Dans un examen systématique, Chen et coll.<sup>28</sup> ont observé une relation linéaire inverse presque parfaite entre la durée du traitement et la réduction des scores sur l'échelle de dépression (coefficient de corrélation des rangs de Spearman = -0,93; valeur de  $p = 0,001$ ). Les principaux avantages des antidépresseurs chez les personnes ayant subi un AVC, soit l'accélération du rétablissement fonctionnel et la réduction de la dépendance, sont toutefois incertains vu les résultats contradictoires entre l'essai FLAME<sup>29</sup>, qui a permis d'observer une amélioration des résultats fonctionnels après 90 jours de traitement à 20 mg de fluoxétine (comparativement à un placebo), et l'essai FOCUS<sup>30</sup>, dans lequel aucune différence de dépendance n'a été observée entre les groupes (20 mg de fluoxétine contre un placebo) après 6 ou 12 mois. La prise d'antidépresseurs a été associée à une réduction de la labilité émotionnelle<sup>31</sup> – une conséquence courante de l'AVC, au même titre que la dépression après un AVC. Dans une analyse combinée fondée sur 776 observations, on a remarqué que le risque de souffrir d'une dépression après un AVC baissait considérablement lorsque le patient avait recours à la

pharmacothérapie prophylactique (rapport de cotes = 0,34; intervalle de confiance à 95 % [0,22 à 0,53]; valeur de  $p = < 0,001$ )<sup>32, 33</sup>.

Les interventions non pharmacologiques pour le traitement de dépression après un AVC peuvent prendre différentes formes, notamment la psychothérapie, l'activité physique, la stimulation cérébrale non invasive et l'acupuncture. Bien que la psychothérapie (ce qui comprend la thérapie de résolution de problèmes, la thérapie cognitivo-comportementale et la technique d'entrevue motivationnelle) soit probablement l'une des stratégies les plus couramment utilisées, il n'a pas été démontré qu'il s'agit d'un traitement efficace pour la dépression chez les personnes ayant subi un AVC lorsqu'il est utilisé seul<sup>27</sup>; toutefois, la psychothérapie peut être efficace si elle est jumelée à la pharmacothérapie<sup>34</sup>. La thérapie comportementale s'est révélée efficace pour le traitement de dépression après un AVC chez les personnes souffrant d'aphasie<sup>35</sup>. L'acupuncture, quant à elle, a aussi démontré son efficacité dans le traitement de dépression après un AVC, bien qu'elle ne soit pas très répandue dans la pratique clinique. Dans une méta-analyse comprenant les résultats de 15 essais cliniques randomisés<sup>36</sup>, un traitement en acupuncture a été associé à de meilleures chances de rétablissement/rémission lorsque comparé à la pharmacothérapie (rapport de cotes = 1,48; intervalle de confiance à 95 % [1,10 à 1,97]). La stimulation cérébrale non invasive, que ce soit une simulation magnétique transcrânienne répétée ou une stimulation transcrânienne à courant continu, est un autre exemple de traitement non classique qui a fait ses preuves quant à la diminution des symptômes dépressifs<sup>37 38</sup>. L'activité physique a également été associée à une réduction petite, mais non négligeable, des scores de dépression dans une méta-analyse qui combinait les résultats de 13 essais cliniques randomisés (différence des moyennes standardisée = -0,13; intervalle de confiance à 95 % [-0,26 à -0,01]; valeur de  $p = 0,03$ )<sup>39</sup>.

## 1. Dépression après un AVC (mise à jour 2019)

### Définitions et descriptions

**Dépression après un AVC** : Dans le présent module, nous examinons la dépression après un AVC. La catégorie du DSM-5 qui s'applique est : *Troubles de l'humeur dus à une autre affection médicale comme un accident vasculaire cérébral avec caractéristiques dépressives, avec épisode d'allure de dépression majeure, ou avec caractéristiques mixtes*. Ils sont souvent associés à un infarctus d'un important vaisseau. (DSM -5 293.83; Robinson et Jorge. *The American Journal of Psychiatry*, vol. 173, n° 3, 1<sup>er</sup> mars 2016), P. 221 À 231).

- Un patient qui est un candidat pour ce diagnostic présenterait une humeur dépressive ou une diminution marquée de l'intérêt ou du plaisir ainsi que quatre autres symptômes de dépression (p. ex., perte de poids, insomnie, agitation psychomotrice, fatigue, sentiment de dévalorisation, concentration diminuée ou idées suicidaires) durant au moins deux semaines.
- Plusieurs mécanismes, y compris des facteurs biologiques, comportementaux et sociaux, sont impliqués dans la pathogénie.
- Les symptômes se manifestent habituellement dans les trois premiers mois suivant l'AVC (dépression précoce après un AVC); cependant, ils peuvent se manifester plus tard (dépression tardive après un AVC). Les symptômes ressemblent à ceux d'une dépression due

à d'autres causes, bien qu'il existe quelques différences; les personnes atteintes de dépression après un AVC souffrent davantage de troubles du sommeil, de symptômes végétatifs et de retrait social.

**Dépression vasculaire :** Il s'agit d'un concept récent qui englobe un plus grand nombre de troubles dépressifs. La dépression vasculaire est liée à une ischémie des petits vaisseaux et l'imagerie cérébrale peut révéler une maladie de la substance blanche chez les personnes qui souffrent d'une dépression vasculaire. La dépression vasculaire comprend également la dépression après un AVC comme sous-catégorie. Les personnes qui ont subi un AVC et qui souffrent de dépression vasculaire sont plus âgées au moment de l'apparition des symptômes, et ont des déficits cognitifs plus importants, moins d'antécédents familiaux et personnels de dépression et des déficiences physiques plus importantes que les personnes âgées qui souffrent de dépression non vasculaire. Ces personnes réagissent différemment aux traitements et ont des pronostics différents. De plus, les personnes qui souffrent de dépression vasculaire et qui ont des déficiences de la fonction exécutive ou les personnes qui présentent une évolution des hyper signaux dans la substance blanche au fil du temps réagissent faiblement au traitement avec des antidépresseurs et ont un tableau clinique de rechute chronique (Taylor W.D., D.C. Steffens, J.R. MacFall, et coll. « White matter hyperintensity progression and late-life depression outcomes », *Archives of General Psychiatry*, vol. 60, 2003, p. 1090à1096).

**Apathie :** Elle est habituellement définie comme un syndrome multidimensionnel de la diminution des comportements, des émotions et de la cognition guidés par un but (Sachdev, 2017; Chen, 2018). Les personnes atteintes manifestent une perte de motivation, d'inquiétude, d'intérêt et de réaction émotionnelle, entraînant une perte d'initiative, une interaction diminuée avec leur environnement et un intérêt réduit à l'égard de leur vie sociale. L'apathie peut nuire au rétablissement après un AVC. Elle peut survenir comme syndrome indépendant, mais elle peut aussi être un symptôme de la dépression ou de la démence (Marin, 1991; Starkstein, 2008). L'apathie survient chez 29 % à 40 % des personnes qui ont subi un AVC (van Dalen 2013).

**Anxiété :** L'anxiété après un AVC est caractérisée par un sentiment de tension, une appréhension ou une inquiétude extrêmes, et des manifestations physiques comme une tension artérielle plus élevée. Les troubles anxieux se manifestent lorsque les symptômes deviennent excessifs ou chroniques. Dans la littérature qui porte sur la vie après un AVC, l'anxiété a été définie par l'examen de la présence et de la gravité des symptômes à l'aide d'échelles de dépistage et d'évaluation (comme la Hospital Anxiety and Depression Scale) ou par la définition des syndromes à l'aide de critères diagnostiques (p. ex., troubles paniques, trouble d'anxiété généralisée, trouble d'anxiété sociale).

1.0 Toutes les personnes qui ont subi un AVC doivent être considérées comme des personnes à risque de dépression après un AVC, laquelle peut survenir à n'importe quelle étape du rétablissement [niveau de preuve A].

- i. Les personnes qui ont subi un AVC et les membres de leur famille doivent être informés et éduqués sur l'impact possible de l'AVC sur leur humeur [niveau de preuve C].
- ii. Ils doivent avoir la possibilité de s'exprimer sur l'impact de l'AVC sur leur vie à toutes les étapes de soins [niveau de preuve C]. [Veuillez consulter le chapitre des transitions de soins des Recommandations pour en savoir plus sur l'éducation du patient et de sa famille, et sur le suivi dans la communauté.](#)

### 1.1 Dépistage de la dépression après un AVC

- i. Toutes les personnes qui ont subi un AVC doivent être soumises à un dépistage de la dépression, si le dépistage est jugé approprié sur le plan médical, étant donné la prévalence élevée de dépression après un AVC et les données probantes appuyant le traitement de la dépression symptomatique après un AVC [niveau de preuve B]. *Remarque : « [Approprié sur le plan médical](#) » exclut les personnes ayant subi un AVC qui sont inconscientes ou qui ont des déficits interférant avec le dépistage des troubles de l'humeur. Tous les diagnostics en matière de santé mentale ou de cognition posés avant l'AVC doivent être pris en considération durant le processus de dépistage.*
- ii. Le dépistage doit être effectué par des professionnels compétents à l'aide d'un outil validé pour maximiser la détection de la dépression [niveau de preuve B]. *Veillez consulter le [tableau 1A à l'annexe 2 pour un résumé des outils de dépistage validés proposés.](#)*
- iii. L'évaluation post-AVC doit inclure l'évaluation des facteurs de risque de dépression, en particulier les antécédents personnels de dépression [niveau de preuve C]. *Veillez consulter la [remarque ci-dessous pour obtenir une liste des facteurs de risque.](#)*
- iv. Pour les personnes qui ont subi un AVC et qui éprouvent un certain niveau de difficultés ou des déficits de communication après un AVC, des stratégies appropriées qui ne reposent pas sur la communication orale doivent être mises en œuvre lors du dépistage de la dépression possible après un AVC afin de s'assurer que le traitement adéquat est accessible et que le dépistage et l'évaluation sont effectués correctement [niveau de preuve C]. *Pour en savoir plus sur les déficits de communication, veuillez consulter [le chapitre sur la réadaptation après un AVC.](#)*

*Remarque : Les facteurs de risque courants associés à la dépression après un AVC comprennent la sévérité de l'AVC, la dépendance fonctionnelle, la présence de déficits cognitifs et les antécédents de dépression. Une dépendance fonctionnelle accrue (p. ex., avoir besoin d'aide pour les activités de la vie quotidienne) et des antécédents de dépression avant l'AVC pourraient être les deux facteurs de risque les plus importants dans la survenue d'une dépression après un AVC. Les déficits de communication et l'isolement social peuvent aussi être considérés comme des facteurs de risque possible de dépression. Veuillez consulter [le chapitre sur les transitions de soins](#) pour en savoir plus sur la dépression parmi les membres de la famille et les aidants d'une personne victime d'un AVC.*

## 1.2 Évaluation de la dépression après un AVC

- i. Les personnes qui ont subi un AVC et chez qui le dépistage a permis de conclure à un risque élevé de dépression doivent être évaluées en temps opportun par un professionnel de la santé ayant des compétences en diagnostic, gestion et suivi de la dépression après un AVC [niveau de preuve C].

### **Facteurs cliniques 1.2 : moment opportun du dépistage de la dépression après un AVC (nouveau en 2019)**

- i. Le dépistage de la dépression après un AVC peut avoir lieu à diverses étapes dans le continuum de soins de l'AVC, particulièrement aux points de transition, puisque l'apparition de la dépression après un AVC peut varier chez les personnes qui ont subi un AVC :
  - a. lors du transfert d'un service de soins aigus en milieu hospitalier à un milieu de réadaptation hospitalier;
  - b. dans un milieu de réadaptation hospitalier avant de retourner dans la communauté;
  - c. durant les visites à la clinique de prévention secondaire;

- d. après le congé dans la communauté, durant les rendez-vous de suivi avec les spécialistes et pendant les évaluations de santé périodiques par des praticiens de soins primaires.
- ii. Le dépistage des symptômes de dépression peut être envisagé pendant le séjour initial au service des soins aigus, s'il est jugé approprié sur le plan médical, particulièrement si des signes de dépression ou de changement d'humeur sont observés ou si les facteurs de risque de dépression sont présents, comme décrit à la section 1.1, iii.
- iii. Plusieurs séances de dépistage peuvent être nécessaires étant donné que le moment idéal pour le dépistage de la dépression après un AVC n'est pas clair.

### 1.3 Gestion non pharmacologique de la dépression après un AVC

- i. Il est raisonnable de considérer soit la thérapie cognitivo-comportementale ou la thérapie interpersonnelle comme des traitements de première ligne de symptômes de dépression après un AVC comme monothérapie [niveau de preuve B].
- ii. Le traitement de la dépression après un AVC peut inclure la psychothérapie comme thérapie adjointe en combinaison avec des antidépresseurs [niveau de preuve A] pour traiter de façon appropriée selon l'état mental et d'autres déficits de la personne qui a subi un AVC (p. ex., la communication et d'autres déficits cognitifs).

#### Facteurs cliniques

- i. D'autres approches de traitement complémentaires de la dépression après un AVC commencent à émerger; les recherches en sont aux toutes premières étapes. Ces approches comprennent la musique, la pleine conscience et la technique d'entrevue motivationnelle. Elles pourraient être envisagées sur une base individuelle à la discrétion du professionnel de la santé traitant, en consultation avec la personne ayant subi un AVC

D'autres approches comprennent les exercices de respiration, la méditation, la visualisation, l'exercice physique, la simulation magnétique transcrânienne répétée ou, dans le cas d'une dépression réfractaire grave, l'électrochoc ou la stimulation cérébrale profonde. Elles ont toutes été suggérées dans la littérature, mais les données probantes ne sont pas suffisantes pour les utiliser systématiquement et elles nécessitent d'autres recherches.

### 1.4 Pharmacothérapie pour la dépression après un AVC

- i. Les personnes qui ont subi un AVC et qui présentent des symptômes dépressifs légers, ou les personnes qui ont reçu un diagnostic de dépression mineure, pourraient bénéficier initialement d'un « suivi attentif »\* [niveau de preuve B]. *Voir la remarque ci-dessous pour une définition de « suivi attentif ».*
  - a. Le traitement pharmacologique doit être envisagé et commencé si la dépression est persistante ou s'aggrave, et nuit aux objectifs cliniques [niveau de preuve B].
- ii. Les personnes qui ont reçu un diagnostic de trouble dépressif devraient être considérées pour l'essai d'antidépresseurs [niveau de preuve A].
- iii. Aucun médicament ou aucune catégorie de médicament n'a été jugé(e) comme étant supérieur(e) dans le traitement de la dépression après un AVC. Toutefois, tenant compte des effets secondaires, les inhibiteurs sélectifs de la recapture de la sérotonine seraient préférables chez les personnes ayant subi un AVC [niveau de preuve A].
  - a. Le choix d'un antidépresseur dépendra des symptômes de dépression, des effets secondaires connus possibles du médicament, particulièrement chez l'enfant ou la

personne âgée, des interactions médicamenteuses avec d'autres médicaments pris à ce moment, et des problèmes médicaux sous-jacents. *Veillez consulter le tableau 1C à l'annexe 2 afin d'obtenir un résumé de l'innocuité et de l'efficacité des agents pharmacologiques proposés pour le traitement de la dépression après un AVC.*

- iv. La réaction au traitement doit être surveillée régulièrement par un professionnel de la santé. La surveillance doit inclure l'évaluation de tout changement dans la sévérité de la dépression, la surveillance des effets secondaires possibles, et la mise à jour des plans de prise en charge en cours [niveau de preuve C].
- v. Si de bons résultats sont obtenus, le traitement doit être poursuivi pendant un minimum de six à douze mois [niveau de preuve C].

*Remarque : Par exemple, un « bon résultat » peut être indiqué par des changements positifs dans les pensées et la perception de soi (sentiments de désespoir, de dévalorisation, de culpabilité), les symptômes émotionnels (tristesse, tendance à pleurer), les symptômes neurovégétatifs (sommeil, appétit), et une motivation accrue pour exécuter les activités de la vie quotidienne.*

- a. Si l'humeur de la personne ne s'est pas améliorée de 2 à 4 semaines après le début du traitement, il faut vérifier si elle prend ses médicaments comme prescrit. Dans l'affirmative, on peut envisager d'augmenter la dose ou de remplacer l'antidépresseur par un autre [niveau de preuve B].
  - b. Après le traitement initial, on peut envisager une thérapie d'entretien sur une base individuelle en tenant compte des antécédents et des facteurs de risque de récurrence de la dépression [niveau de preuve C].
  - c. Si l'on prend la décision d'interrompre l'administration d'un antidépresseur, il faut prévoir un sevrage progressif sur une période d'un à deux mois [niveau de preuve C].
- vi. À la suite du traitement initial de la dépression après un AVC, les personnes qui ont subi un AVC doivent continuer à être évaluées relativement à la rechute ou à la récurrence des symptômes dépressifs [niveau de preuve C].
  - vii. Affect pseudobulbaire : Dans les cas problématiques et persistants de réaction émotionnelle d'intensité inappropriée quant à leur intensité ou leur contexte d'apparition, d'incontinence émotionnelle ou de labilité, un essai d'antidépresseurs doit être envisagé [niveau de preuve A].
    - a. Les effets secondaires indiquent que certains inhibiteurs sélectifs de la recapture de la sérotonine sélectifs pourraient être préférables à d'autres pour cette population. Il n'existe pas de données probantes qui appuient un traitement autre que la pharmacothérapie pour ce problème. *Veillez consulter le tableau 1C à l'annexe 2 afin d'obtenir un résumé des agents pharmacologiques proposés pour le traitement de la dépression après un AVC.*

*Remarque : Le suivi attentif est défini comme une période au cours de laquelle la personne qui présente des symptômes dépressifs légers est surveillée étroitement sans autres interventions thérapeutiques afin de déterminer si ses symptômes dépressifs seront atténués. Dans la littérature, la période de suivi attentif varie entre 2 et 4 semaines. Elle est souvent décrite comme un moment où l'on suggère à la personne des stratégies d'autogestion et où elle doit être encouragée à pratiquer des activités physiques.*

## Facteurs cliniques

- i. La participation et la rétroaction des personnes ayant subi un AVC, de leur famille et des aidants peuvent être un volet important de la surveillance continue des changements d'humeur et des autres problèmes après un AVC.
- ii. Les séances d'information et de consultation offertes aux patients et à leur famille doivent comprendre de l'information au sujet du risque de rechute ou de récurrence des symptômes, les signes à surveiller, l'importance de prendre leurs médicaments comme prescrit, et de communiquer avec leur médecin de premier recours ou leur spécialiste en santé mentale si ces signes se manifestent de nouveau.
- iii.

### 1.5 Traitement prophylactique de la dépression après un AVC

- i. Bien qu'il ait été démontré que la pharmacothérapie prophylactique prévient les symptômes de dépression après un AVC [niveau de preuve A], son impact sur les fonctions est moins clair. Pour le moment, l'utilisation régulière d'antidépresseurs prophylactiques pour TOUTES les personnes qui ont subi un AVC n'est pas recommandée, étant donné que le rapport risque-bénéfice n'a pas été clairement établi [niveau de preuve B].
- ii. D'autres recherches sont nécessaires pour définir les personnes à *risque* qui ont subi un AVC, le choix d'antidépresseurs, le moment opportun optimal et la durée de l'intervention.  
  
Il a été démontré que la thérapie de résolution de problèmes (p. ex., thérapie cognitivo-comportementale) est efficace dans le traitement prophylactique de la dépression après un AVC [niveau de preuve B].

### 1.6 Autres états d'humeur

- i. Le dépistage de l'anxiété peut être envisagé chez les personnes qui ont subi un AVC comme il a été prouvé que la prévalence était accrue après un AVC [niveau de preuve B].
  - a. Un outil de dépistage validé doit être utilisé pour détecter la présence de l'anxiété [niveau de preuve B].
  - b. Les personnes qui ont subi un AVC et qui ont depuis des difficultés à communiquer doivent être soumises à un dépistage de l'anxiété à l'aide de méthodes appropriées validées pour les personnes aphasiques qui ont subi un AVC [niveau de preuve B].
- ii. L'anxiété coexiste fréquemment avec la dépression après un AVC, ou peut survenir chez les personnes qui ont subi un AVC qui ne sont pas déprimées cliniquement. Il semble raisonnable d'offrir la pharmacothérapie aux personnes ayant subi un AVC qui souffrent d'une anxiété marquée accompagnée ou non de dépression clinique [niveau de preuve C].
  - a. Même si les données probantes sont limitées pour les personnes qui ont subi un AVC, la psychothérapie peut être envisagée comme solution complémentaire à la pharmacothérapie [niveau de preuve C].
- iii. Il a été démontré que la thérapie de résolution de problèmes (p. ex., thérapie cognitivo-comportementale) est efficace dans le traitement de l'anxiété après un AVC [niveau de preuve B].
- iv. L'apathie coexiste fréquemment avec la dépression après un AVC, ou peut survenir chez les personnes qui ont subi un AVC qui ne sont pas déprimées cliniquement. Il semble raisonnable d'offrir des interventions non pharmacologiques, comme l'activité physique ou la musicothérapie, aux personnes ayant subi un AVC qui souffrent d'une apathie marquée accompagnée ou non de dépression clinique [niveau de preuve C]. Les psychostimulants ont été mis à l'essai, mais les données probantes restent limitées [niveau de preuve C].

v.

### 1.7 Surveillance, soutien et éducation sur une base continue

- i. Les personnes qui ont subi un AVC et les membres de leur famille doivent être informés et éduqués sur l'impact possible de l'AVC sur leur humeur [niveau de preuve C].
- ii. Ils doivent avoir la possibilité de s'exprimer sur l'impact de l'AVC sur leur vie à toutes les étapes de soins. *Veillez consulter le chapitre des transitions de soins pour en savoir plus sur l'éducation du patient et de sa famille, et sur le suivi dans la communauté.*

## SECTION 2 : RECOMMANDATIONS EN MATIÈRE DE COGNITION APRÈS UN AVC

Le taux de prévalence rapporté du déficit cognitif d'origine vasculaire chez les personnes ayant subi un AVC est d'environ 20 % dans les trois premiers mois suivant l'AVC<sup>49, 50</sup> et augmente à 29 % au cours des cinq années suivantes<sup>6</sup>. Dans un examen systématique fondé sur des résultats de 73 études, Pendlebury et Rothwell<sup>51</sup> ont estimé que le taux groupé d'incidence cumulative de démence découlant d'un AVC augmentait de façon linéaire de 3,0 % par année. Parmi les prédicteurs courants de démence découlant d'un AVC figurent l'âge, un faible niveau d'éducation, des antécédents d'AVC, le diabète, la fibrillation auriculaire, un déficit cognitif préexistant et la gravité de l'AVC<sup>51</sup>.

Les tests les plus couramment utilisés pour effectuer le dépistage de problèmes de fonction cognitive après un AVC sont la Montreal Cognitive Assessment (MoCA) [évaluation cognitive de Montréal] et le Mini-Mental State Examination (MMSE) [mini examen de l'état mental]. La sensibilité diagnostique et la spécificité du MMSE ont été estimées respectivement à 82 % et à 76 % pour la détection des troubles cognitifs légers selon des seuils de < 26 ou < 27 sur 30<sup>52</sup>, et à 88 % et à 62 % pour la détection de démence ou d'un trouble cognitif multiple<sup>53</sup>. Par contre, les estimations correspondantes de la sensibilité diagnostique et de la spécificité combinées de la MoCA pour un seuil de < 26 étaient respectivement de 95 % et de 45 %<sup>53</sup>. De façon générale, la MoCA semble présenter une meilleure sensibilité diagnostique que le MMSE pour détecter la présence de déficits cognitifs d'origine vasculaire, en particulier lorsqu'il est question de déficits légers.

L'utilisation d'agents antihypertenseurs à la suite d'un AVC pour réduire le risque de déclin des fonctions cognitives a été évaluée dans un nombre restreint d'essais, dans lesquels la cognition se retrouve parmi les résultats primaires, et pas parmi ceux secondaires. Dans le Prevention of Decline in Cognition after Stroke Trial<sup>54</sup> (PODCAST) [essai sur la prévention du déclin cognitif après un AVC], bien qu'il se soit terminé avant d'avoir réussi à recruter les 600 participants prévus, il a été observé que la gestion rigoureuse de la tension artérielle a permis de réduire de façon considérable la tension artérielle systolique et la tension artérielle diastolique, et ce, sans altérer les résultats cognitifs chez les personnes ayant une cognition normale ou près des valeurs normales à la base. La réduction de la tension artérielle constituait l'une des

composantes d'un programme d'intervention multidisciplinaire évalué dans le cadre de l'essai de l'Austrian Polyintervention Study to Prevent Cognitive Decline After Ischemic Stroke<sup>55</sup> (ASPIS) [étude d'intervention multidisciplinaire pour prévenir le déclin cognitif après un AVC ischémique]. Pour cette étude de 24 mois, 202 patients ont été retenus et, dans les trois mois suivant leur AVC, ont été répartis de façon aléatoire dans un des deux groupes suivants : un groupe participant à un programme d'intervention intensive qui mettait l'accent sur la maîtrise de la tension artérielle, l'augmentation de l'activité physique (avec un objectif d'activité physique modérée à vigoureuse, soit 3 à 5 fois/semaine) et sur une saine alimentation (avec un régime dit prudent ou de type méditerranéen), tout en encourageant la perte de poids grâce à un programme d'entraînement pour éviter les cas d'obésité ou de problèmes cognitifs (au moyen d'exercices à faire à la maison) et l'abandon du tabac; et un groupe témoin, dans lequel les patients ont reçu des soins selon les normes habituelles. Après 24 mois, il n'y avait pas de différences flagrantes entre les deux groupes en ce qui concerne le nombre de patients chez qui on remarquait un déclin cognitif (10,5 % des patients dans le groupe d'intervention contre 12 % dans le groupe témoin). Bien qu'une récente revue systématique Cochrane<sup>56</sup> n'ait pas été en mesure de démontrer que la tension artérielle avait un effet statistiquement significatif pour réduire le risque de démence chez les patients ayant des antécédents d'AVC ou d'AIT (rapport de risque = 0,88; intervalle de confiance à 95 % [0,73 à 1,06]; n = 2 essais), la maîtrise de la tension artérielle est tout de même fortement indiquée auprès de cette population afin de réduire les récurrences d'AVC, qui constituent le principal facteur de risque de démence après un AVC.

Les données probantes d'essais cliniques randomisés antérieurs ne permettent pas de déterminer si la baisse de la tension artérielle prévient la démence chez les personnes n'ayant pas d'antécédents d'AVC (rapport de risque combiné = 0,93; intervalle de confiance à 95 % [0,84 à 1,02])<sup>57</sup>. Plus récemment, deux groupes randomisés de participants souffrant d'hypertension ont été comparés dans l'étude Systolic Blood Pressure Intervention Trial – Memory and Cognition in Decreased Hypertension<sup>58</sup> (SPINT-MIND 2019) [essai sur l'intervention en matière de tension artérielle systolique – mémoire et cognition dans la baisse de l'hypertension] : dans l'un, on prodiguait aux patients un traitement visant à faire descendre de façon intensive la tension artérielle (objectif de la pratique optimale = < 120 mm Hg); dans l'autre, les patients recevaient le traitement habituel (objectif de la pratique optimale = < 140 mm Hg) pendant une période allant jusqu'à six ans. Après une durée de traitement médiane de 3,34 années et un suivi médian de 5,11 années, il n'y avait pas de différence notable entre les deux groupes en ce qui concerne les résultats cognitifs primaires quant au risque de démence probable (7,2 [groupe d'intervention intensive] contre 8,6 cas [groupe témoin] par 1 000 années-personnes; rapport de risque = 0,83; intervalle de confiance à 95 % [0,67 à 1,04]; valeur de p = 0,10). Toutefois, le risque de déficit cognitif léger et de résultat composite à cet égard ou de démence probable était considérablement plus bas dans le groupe d'intervention intensive (groupe d'intervention : rapport de risque = 0,81; intervalle de confiance à 95 % [0,69 à 0,95]; valeur de p = 0,007; groupe témoin : rapport de risque = 0,85; intervalle de confiance à 95 % [0,74 à 0,97]; valeur de p = 0,01).

Les interventions de réadaptation cognitive pour les déficits cognitifs d'origine vasculaire associés à un AVC se concentrent sur les déficits courants (attention, mémoire ou fonction exécutive). En général, les interventions ont tendance à viser l'un de deux objectifs : 1) renforcer ou rétablir les compétences ou fonctions comportementales affaiblies ou perdues (p. ex., en invitant le patient à faire des exercices informatisés); ou 2) enseigner des mécanismes de compensation (p. ex., à l'aide d'une formation en stratégie) internes ou externes au patient<sup>59</sup>. Une récente revue systématique Cochrane menée par R. das Nair et N. B. Lincoln<sup>60</sup> a comparé les résultats de 13 essais cliniques randomisés (n = 514) qui examinaient différentes stratégies de réadaptation pour la mémoire, notamment l'entraînement informatisé de la mémoire, la formation en stratégie, l'utilisation d'aide-mémoire externes et les procédés mnémotechniques à base d'imagerie mentale. L'entraînement de la mémoire a été associé à une amélioration importante des mesures de la mémoire *subjective* à court terme (différence des moyennes standardisée = 0,36; intervalle de confiance à 95 % [0,08 à 0,64]; valeur de p = 0,01), mais ce n'est pas le cas des mesures de la mémoire *objective*. L'étude n'a pas permis de tirer de conclusions quant aux effets à long terme des mesures de la mémoire subjective ou objective trois et sept mois après le traitement. Dans un essai clinique randomisé axé sur cinq domaines cognitifs (attention, vitesse, mémoire, flexibilité et résolution de problèmes) et proposant une activité de jeu vidéo sur ordinateur de 600 minutes sur une période de huit semaines<sup>61</sup>, les environnements enrichis ont contribué à l'amélioration des mesures de la mémoire de travail, mais pas à celles de l'attention. Une autre revue systématique Cochrane<sup>62</sup> a combiné les résultats de six essais cliniques randomisés évaluant les interventions visant à restaurer l'attention ou à fournir des stratégies de compensation aux personnes ayant un déficit de l'attention à la suite d'un AVC. Il a été observé que la réadaptation cognitive a permis une amélioration considérablement plus élevée des résultats des évaluations d'attention partagée que ceux d'attention générale ou relatifs aux fonctions (activités du quotidien). Les données sur l'efficacité de la réadaptation de la fonction exécutive et de la résolution de problèmes sont moins convaincantes. Les résultats de deux études systématiques suggèrent que ni l'approche réparatrice ni l'approche compensatoire, qui utilisent toutes deux des techniques variées, n'étaient efficaces<sup>63, 64</sup>. Étant donné que les déficits cognitifs peuvent se présenter de façon manifeste dans tous les domaines cognitifs (notamment, l'attention, la mémoire et la fonction exécutive), une étude systématique proposée évaluera les données probantes d'essais non randomisés portant sur une réadaptation cognitive de toutes les formes de déficits cognitifs à l'aide d'interventions psychologiques<sup>65</sup>.

D'autres interventions, telles que l'activité physique, qui peut prendre la forme d'aérobic, d'entraînement contre résistance ou de physiothérapie, ont été associées à des améliorations légères, mais statistiquement significatives, des mesures de déficit cognitif après un AVC<sup>66, 67</sup>. La stimulation cérébrale non invasive à courant continu a également été associée à des améliorations en matière de fonctions cognitives après un AVC<sup>68</sup>.

En ce qui concerne les traitements pharmacologiques, des agents cholinergiques comme le donépézil et la galantamine ont été examinés dans le cadre d'un traitement pour un déficit

cognitif après un AVC. Le donépézil, un inhibiteur sélectif d'acétylcholinestérase, a été le sujet de trois grands essais cliniques randomisés<sup>69-71</sup>. Lors de ces essais, les patients atteints de démence possible ou probable après un AVC ont été séparés en trois groupes : pendant 24 semaines, deux groupes recevaient une quantité de l'agent (5 ou 10 mg), tandis que l'autre recevait un placebo. Dans tous les essais, les participants des groupes recevant du donépézil ont présenté une amélioration considérablement plus grande sur la sous-échelle cognitive de la Vascular Alzheimer's Disease Assessment Scale (V-ADAS-cog) [échelle d'évaluation de la démence vasculaire] ou sur la sous-échelle cognitive de la Alzheimer's Disease Assessment Scale (ADAS-cog) [échelle d'évaluation de la maladie d'Alzheimer] comparativement aux patients du groupe avec le placebo. Dans l'un de ces essais<sup>70</sup>, 11 participants (1,7 %) du groupe ayant reçu du donépézil sont décédés pendant la durée de l'étude, et il a été déterminé que trois des décès pouvaient être liés à la prise de donépézil. Aucun décès n'est survenu dans le groupe témoin. Le traitement à 24 mg de galantamine pendant 24 semaines a été associé à une amélioration considérable des scores sur l'ADAS-cog comparativement à la prise d'un placebo, et ce, dans deux essais incluant des patients atteints de démence possible ou probable après un AVC<sup>72, 73</sup>. Il a également été observé que la prise de mémantine, antagoniste du récepteur N-méthyl-D-aspartate, améliorait les fonctions cognitives des personnes souffrant de démence vasculaire<sup>74, 75</sup>.

D'autres agents pharmacologiques ont été évalués dans le traitement de la démence après un AVC. La citicoline a été associée à des chances plus élevées de ne pas souffrir de démence chez les personnes se remettant d'un premier AVC ischémique et présentant un déficit neurologique persistant<sup>76</sup>. Un lien a également été établi entre les antidépresseurs et une amélioration de la fonction exécutive<sup>77</sup> et de la faculté à résoudre les problèmes<sup>78</sup> chez les personnes ayant subi un AVC. La prise d'Actovegin, un nouvel agent thérapeutique qui pourrait améliorer le métabolisme oxydatif dans le cerveau, a récemment été évaluée chez des patients à la suite d'un AVC ischémique aigu. Le score obtenu à la MoCA était de  $\leq 25$  points<sup>79</sup>. Après trois, six et douze mois, le nombre de patients remplissant les critères propres à ce qui constitue un répondant ( $\geq 4$  points d'amélioration sur la sous-échelle cognitive de l'ADAS-cog par rapport à une évaluation de référence) a considérablement augmenté dans le groupe prenant de l'Actovegin.

## 2. Déficits cognitifs d'origine vasculaire (mise à jour 2019)

### Définitions et descriptions

**Les déficits cognitifs d'origine vasculaire** comprennent les troubles cognitifs et du comportement associés aux maladies et facteurs de risque vasculaires cérébraux, allant des déficits cognitifs légers jusqu'à la démence franche. Les déficits cognitifs d'origine vasculaire sont un syndrome associé à des déficits cognitifs touchant au moins un domaine cognitif (p. ex., l'attention, la mémoire, le langage, la perception ou les fonctions exécutives), et à des données probantes d'un AVC clinique ou d'une lésion vasculaire cérébrale subclinique. Les déficits cognitifs d'origine vasculaire incluent une vaste gamme de déficits cognitifs, allant des troubles cognitifs légers

d'origine vasculaire à la démence vasculaire, soit la forme la plus grave. Les déficits cognitifs d'origine vasculaire jouent aussi un rôle important chez les personnes souffrant de la maladie d'Alzheimer, qui présentent des lésions vasculaires coexistantes. *Les critères diagnostiques pour les déficits cognitifs d'origine vasculaire après un AVC ont été définis par Gorelick et coll. (2011), puis révisés par l'International Society for Vascular Behavioural and Cognitive Disorders (VasCog) [2014], et sont présentés au tableau 2A (hyperlien).*

**Déficits cognitifs :** Le modèle des déficits cognitifs dans les déficits cognitifs d'origine vasculaire peut comprendre tous les domaines cognitifs (voir Sachdev et coll., 2014, tableau 1). Les domaines les plus fréquemment touchés sont l'attention, la vitesse de traitement et les fonctions exécutives frontales (qui comprennent des fonctions comme la planification, la prise de décisions, le jugement, la correction d'erreurs, l'incapacité de poursuivre une tâche fixée ou de passer à une autre, et une déficience de la capacité de manipuler l'information, p. ex., mémoire de travail). D'autres domaines cognitifs qui peuvent être touchés comprennent l'apprentissage et la mémoire (mémoire immédiate, récente et de reconnaissance), le langage (expression orale du langage, capacité de compréhension, dénomination, grammaire et syntaxe), les habiletés visuo-constructives et perceptuelles, la praxie, la gnosie, le schéma corporel et la cognition sociale.

**Pathologie vasculaire :** Les déficits cognitifs peuvent résulter de diverses pathologies vasculaires (voir Sachdev et coll., 2014, tableau 3), y compris plusieurs ou de volumineux infarctus corticaux, plusieurs infarctus sous-corticaux, des infarctus « silencieux », des infarctus stratégiques, la maladie des petits vaisseaux (changements ischémiques de la substance blanche, plusieurs infarctus lacunaires, dilatation des espaces de Virchow-Robin, micro-infarctus corticaux et microhémorragies), et une hémorragie cérébrale. Les facteurs de risque comme l'hypertension, le diabète et l'hypoperfusion cérébrale focale ou globale sont associés aux déficits cognitifs.

**2.0** Toutes les personnes victimes d'un AVC ou d'un AIT cliniquement manifestes doivent être considérées comme à risque de déficits cognitifs d'origine vasculaire (DCV) [niveau de preuve B].

*Remarque : Le dépistage et l'évaluation des déficits cognitifs d'origine vasculaire doivent être nuancés par plusieurs facteurs. Dans la version actuelle des recommandations, nous avons inclus une section intitulée « Facteurs cliniques », dans laquelle nous présentons un bref exposé des problèmes relevés dans l'examen des données ou par le consensus d'experts qui nuisent à l'efficacité ou à l'interprétation des données du dépistage et de l'évaluation des déficits cognitifs – voir ci-dessous.*

### **2.1 Dépistage des déficits cognitifs d'origine vasculaire**

- i. On doit envisager un dépistage des déficits cognitifs d'origine vasculaire pour les personnes ayant subi un AVC ou un AIT [niveau de preuve C]. Il peut être effectué avant d'accorder un congé du service de soins aigus si des préoccupations au sujet de la cognition sont soulevées, durant la réadaptation en milieu hospitalier et durant le suivi après un AVC dans les milieux extrahospitalier et communautaire [niveau de preuve C].
- ii. Les personnes qui ont subi un AVC avec d'autres facteurs de risque importants pour les maladies vasculaires et les déficits cognitifs d'origine vasculaire, tels que des résultats de neuro-imagerie confirmant un AVC silencieux ou une maladie de la substance blanche, de l'hypertension, du diabète, une fibrillation auriculaire ou d'autres maladies cardiaques, doivent faire l'objet d'un dépistage des déficits cognitifs d'origine vasculaire, surtout celles qui présentent des changements au niveau perceptuel, cognitif ou fonctionnel cliniquement manifestes ou rapportés pendant l'anamnèse [niveau de preuve B].

- iii. Le dépistage du déficit cognitif d'origine vasculaire doit être effectué à l'aide d'un outil de dépistage validé, tel que le test Montreal Cognitive Assessment [niveau de preuve B]. *Veillez consulter le tableau 2B pour obtenir un résumé des outils de dépistage et d'évaluation de DCV suggérés, et leurs propriétés psychométriques.*

*Remarque : Le dépistage de la fonction cognitive globale à l'aide d'un outil validé peut être effectué pour comprendre objectivement l'impact fonctionnel du déficit cognitif d'origine vasculaire.*

Les étapes de soins dans le continuum peuvent inclure :

- pendant le séjour aux soins aigus, surtout si des problèmes cognitifs, perceptuels ou fonctionnels sont notés en l'absence de délirium;
- pendant la réadaptation dans les milieux hospitalier et extrahospitalier, et à la maison, selon les progrès du patient;
- après le congé du service d'urgence ou du milieu hospitalier pour retourner dans un milieu de soins de santé communautaire ou extrahospitalier.

## 2.2 Évaluation des déficits cognitifs d'origine vasculaire

- i. Le diagnostic de déficits cognitifs d'origine vasculaire nécessite la présence d'une maladie vasculaire cérébrale. L'imagerie cérébrale par tomographie par ordinateur (TDM) ou par imagerie par résonance magnétique (IRM) est utile pour évaluer la maladie vasculaire cérébrale [niveau de preuve B].
- a. L'IRM est plus sensible que la TDM aux modifications vasculaires.
  - b. Les antécédents cliniques et les constatations faites aux examens qui correspondent à un AVC peuvent être utilisés comme preuves objectives de la maladie vasculaire cérébrale si l'imagerie n'est pas disponible.
- ii. Les personnes qui ont subi un AVC et qui démontrent des déficits cognitifs (cliniquement, selon les antécédents, par signalement du patient ou de sa famille, ou au cours du processus de dépistage) doivent être évaluées par des professionnels de la santé possédant les compétences nécessaires quant au fonctionnement neurocognitif, idéalement par un neuropsychologue clinique [niveau de preuve C].
- iii. L'impact des déficits sur le fonctionnement et la sécurité du patient dans les activités de la vie quotidienne, les activités instrumentales de la vie quotidienne ainsi que les activités professionnelles et scolaires, doit aussi être évalué (p. ex., conduite d'un véhicule, sécurité à la maison) [niveau de preuve C].
- iv. Les personnes qui ont subi un AVC, chez qui l'on soupçonne des déficits cognitifs, doivent aussi faire l'objet d'un dépistage de la dépression, étant donné qu'il est démontré que la dépression contribue aux déficits cognitifs d'origine vasculaire [niveau de preuve B]. *Veillez consulter [la recommandation 1.0 sur la dépression après un AVC pour en savoir plus.](#)*
- v. Avant un congé ou un transfert du service de soins aigus ou de la réadaptation en milieu hospitalier, les personnes souffrant de problèmes cognitifs graves après un AVC doivent faire l'objet d'une évaluation des risques liés à la sécurité découlant de déficits cognitifs persistants et leur équipe de soins de première ligne doit en être informée [niveau de preuve C].
- vi. Les résultats de ces évaluations doivent être utilisés pour orienter le choix et l'application de mesures correctives et de stratégies d'intervention compensatoires et/ou adaptatives, selon les besoins et les objectifs centrés sur la personne [niveau de preuve C].

- vii. Les personnes qui ont subi un AVC doivent faire l'objet d'une évaluation complète de leurs forces et faiblesses cognitives durant la réadaptation ou avant de recommencer des activités exigeantes sur le plan cognitif comme conduire ou travailler [niveau de preuve C].

*Remarque : Les experts en évaluation neurocognitive peuvent inclure le neuropsychologue, le psychologue, l'ergothérapeute, l'orthophoniste, l'infirmier clinicien spécialisé, le psychiatre, le physiatre, le gériatre, le neurologue, le spécialiste de la mémoire, et le pédiatre spécialisé en développement. Les experts doivent posséder des compétences particulières pour administrer bon nombre des évaluations indiquées.*

**Facteurs cliniques associés au dépistage et à l'évaluation des déficits cognitifs d'origine vasculaire** (*Énoncés déplacés des sections de recommandations pour 2019*)

- i. Les déficits cognitifs d'origine vasculaire sont associés à un éventail de déficits possible. Une évaluation supplémentaire peut être envisagée pour évaluer les déficits relatifs au niveau d'éveil et de vigilance, à la fonction sensorimotrice, à l'attention, à l'orientation, à la mémoire, au langage, à l'agnosie, à la fonction visuo-spatiale ou perceptuelle, aux praxies, à la vitesse de traitement de l'information et aux fonctions exécutives.
- a. L'attention, la vitesse de traitement et les fonctions exécutives sont souvent touchées après un AVC. Les fonctions exécutives à évaluer peuvent comprendre l'initiation, l'inhibition, l'évolution, l'intuition, la planification et l'organisation, le jugement, la résolution de problème, le raisonnement abstrait, et la cognition sociale.
- ii. Sélection des outils d'évaluation : Une évaluation cognitive peut être menée à l'aide d'évaluations normalisées pour déterminer la nature et la sévérité des déficits cognitifs, ainsi que la préservation des capacités et des forces cognitives restantes.
- a. Les activités thérapeutiques ou les observations fonctionnelles peuvent fournir des renseignements supplémentaires en montrant l'impact des déficits.
- b. Les outils utilisés pour évaluer les déficits cognitifs d'origine vasculaire peuvent être uniques aux milieux, aux régions géographiques, aux professions et aux échéanciers dans le continuum de soins. La validité et la normalisation des outils sélectionnés doivent être envisagées en fonction de facteurs comme l'âge, le sexe, la langue, l'aphasie et le niveau d'éducation.
- iii. Comorbidités : Le dépistage ou l'évaluation des déficits cognitifs d'origine vasculaire doivent tenir compte de tout facteur immédiat qui pourrait avoir un effet sur les résultats de l'évaluation, comme les déficits sensorimoteurs et de communication (élocution et langage, vision, ouïe), le délirium, l'hypovigilance, des symptômes neuropsychiatriques (p. ex., dépression, apathie et anxiété), et d'autres problèmes médicaux pouvant avoir un impact temporaire sur la cognition.
- iv. Durée : L'impact et la présentation des déficits cognitifs d'origine vasculaire peuvent varier avec le temps. Le dépistage et l'évaluation chez les personnes qui ont subi un AVC considérées à risque de déficits cognitifs doivent avoir lieu à différentes étapes des soins (réadaptation, points de transition, suivi dans la communauté) comme le suggère la sévérité du tableau clinique, des comorbidités, des antécédents et/ou des anomalies à l'imagerie et des besoins ou des objectifs de la personne et de l'aidant.
- v. Évaluations multiples : Même si le dépistage et les évaluations à différentes étapes des soins sont importants pour guider le diagnostic et la prise en charge, il faut aussi être conscient de l'impact possible de plusieurs évaluations sur la validité des résultats ainsi que sur la personne ayant subi un AVC (p. ex., effets d'apprentissage, fatigue causée par les tests). Pour éviter les effets de la pratique, l'utilisation de différentes formes d'évaluation équivalentes est recommandée lorsqu'elles sont disponibles (p. ex., MoCA a trois versions).

- vi. Étape de la vie : Les effets de l'âge ou du stade de développement, ou les fonctions avant l'AVC doivent être pris en considération en décidant du moment ou de l'objet de l'évaluation. Le choix de l'objet de l'évaluation doit tenir compte des objectifs axés sur la personne, qui peuvent varier selon l'âge
- vii. Capacités : Les professionnels doivent tenir compte de la capacité d'une personne à faire des choix et à prendre des décisions de façon éclairée. Les lois provinciales en matière de capacités doivent être examinées et des mandataires doivent être identifiés dans le cas où la personne victime d'un AVC serait considérée comme étant incapable de prendre des décisions spécifiques, par exemple par rapport à ses soins de santé personnels ou à son autogestion après son congé. Dans des circonstances particulières, lorsque les capacités sont remises en question, un tiers, agissant à titre d'évaluateur des capacités désigné, peut déterminer la capacité mentale d'une personne à prendre des décisions relatives à ses biens, à ses finances et au soin de sa personne.

### 2.3 Gestion des déficits cognitifs d'origine vasculaire après un AVC

- i. Les facteurs de risque cardiovasculaires (p. ex., hypertension, diabète) doivent être gérés pour réduire au maximum le risque de récurrence d'un AVC [niveau de preuve A], comme ils sont associés aux déficits cognitifs [niveau de preuve B]. [Veillez consulter le chapitre sur la prévention secondaire de l'AVC des Recommandations pour en savoir plus.](#)
  - a. Le traitement de l'hypertension peut réduire le déclin de la cognition, même en l'absence d'AVC, et doit être envisagé pour toutes les personnes souffrant d'hypertension qui présentent un risque accru [niveau de preuve B] ou pour celles qui ont subi un AVC et qui ont une pression artérielle élevée [niveau de preuve A].
- ii. Les interventions dans les cas de déficits cognitifs doivent être personnalisées en tenant compte des considérations suivantes :
  - a. Les objectifs doivent être axés sur la personne et sensibles aux valeurs et attentes de celle-ci, de sa famille et des aidants [niveau de preuve B].
  - b. Les objectifs et les interventions doivent tenir compte des forces et des faiblesses du profil cognitif et des capacités de communication de la personne touchée [niveau de preuve C].
  - c. Les personnes qui ont subi un AVC et qui éprouvent des problèmes de cognition ou de communication pourraient avoir besoin d'un soutien supplémentaire (p. ex., l'engagement des membres de la famille) pour optimiser la participation du patient à l'établissement d'objectifs et/ou à la réadaptation [niveau de preuve C].
  - d. Les interventions doivent être personnalisées en se fondant sur les meilleures données probantes disponibles, et avoir pour objectif à long terme de faciliter la reprise de la participation et des activités souhaitées (p. ex., soins personnels, gestion financière et domestique, loisirs, conduite d'un véhicule, retour au travail) [niveau de preuve C].
  - e. Sévérité des déficits : Si le niveau de déficit a atteint la démence modérée (la personne est donc incapable de vivre de façon autonome), il est raisonnable que les interventions soient davantage axées sur la formation et le soutien de l'aidant en plus, ou en remplacement de la réadaptation cognitive [niveau de preuve C].

- iii. Les interventions qui peuvent être envisagées pour la réadaptation des personnes qui souffrent de déficits cognitifs d'origine vasculaire peuvent comprendre une formation en stratégie compensatoire ou une formation directe en mesure de correction ou en compétences cognitives [niveau de preuve B]. Le choix des stratégies doit être personnalisé en fonction du profil clinique de la personne.
  - a. La formation en stratégie compensatoire doit être axée sur l'enseignement de stratégies visant à prendre en charge les déficits, et elle cible souvent les limitations liées aux activités afin de promouvoir l'autonomie [niveau de preuve B]. Elle peut inclure les changements de l'environnement physique ou social ou la modification des moyens utilisés pour exécuter une activité [niveau de preuve B].
  - b. La formation directe en mesure de correction ou en compétences cognitives doit être axée sur un enseignement particulier intense visant à améliorer directement le domaine cognitif atteint. Elle peut inclure des exercices d'entraînement et de pratique, des stratégies mnémoniques (p. ex., acronymes, chansons), ou des outils informatiques visant certains déficits particuliers [niveau de preuve B].
- iv. Les déficits de mémoire peuvent être traités à l'aide de compensations reposant sur des stratégies externes (p. ex., appareils et accessoires fonctionnels électroniques ou non), et des stratégies internes (p. ex., stratégies de codage et de récupération, formation en autoefficacité et apprentissage sans erreur). Certaines données probantes sur ces traitements indiquent des bienfaits relativement à la limitation des activités [niveau de preuve B].
  - a. La formation en compétences informatiques dirigée par un thérapeute peut être envisagée pour les déficits de mémoire de travail [niveau de preuve B].
- v. Les déficits de fonctions exécutives peuvent être traités à l'aide d'une formation en stratégie métacognitive ou de stratégies de résolution de problèmes, sous la supervision d'un thérapeute [niveau de preuve B].
- vi. La formation en stratégie interne qui peut être envisagée inclut des stratégies visant à améliorer la gestion des objectifs, la résolution de problème, la gestion du temps, et le raisonnement métacognitif [niveau de preuve B].
- vii. Les exercices aérobiques peuvent être considérés comme traitement complémentaire des déficits cognitifs touchant l'attention, la mémoire et les fonctions exécutives [niveau de preuve B]. *Veillez consulter le [chapitre sur la réadaptation après un AVC pour en savoir plus sur l'exercice](#).*
- viii. Les personnes ayant subi un AVC qui sont atteintes de déficits cognitifs et présentent des changements d'humeur (p. ex., dépression, anxiété), ou d'autres changements de comportement lors du dépistage, doivent être orientées vers un professionnel de la santé mentale qualifié et prises en charge par ce dernier [niveau de preuve B]. *Veillez consulter la [section 1 sur la dépression après un AVC pour en savoir plus](#).*

#### **Facteurs cliniques associés à la gestion des déficits cognitifs d'origine vasculaire**

- i. Les capacités d'apprentissage des personnes présentant des déficits cognitifs d'origine vasculaire après un AVC doivent être prises en considération au moment de déterminer l'intervention et la meilleure façon d'offrir l'éducation nécessaire pour maximiser les avantages de l'intervention (p. ex., enseigner des tâches à l'aide de la démonstration, de l'instruction orale, d'un rythme lent et de répétitions, au besoin).

- ii. Les interventions axées sur l'ordinateur peuvent être considérées comme une solution complémentaire au traitement guidé par le clinicien – la recherche à ce sujet continue d'évoluer rapidement.
- iii. Les données probantes indiquant l'impact des limitations sur l'activité ou la participation sont limitées, et nécessitent davantage de recherche.
- iv. De nouvelles interventions cognitives, qui pourraient être bénéfiques, comprennent la stimulation magnétique transcrânienne répétitive ou à courant continu, l'utilisation d'environnements de réalité virtuelle, et l'application d'approches thérapeutiques par contrainte induite pour le domaine cognitif déficient. Ces stratégies nécessitent d'autres recherches avant que des recommandations puissent être élaborées sur leur utilisation.

*Veillez consulter [le chapitre sur la réadaptation post-AVC des Recommandations](#) pour en savoir plus sur le traitement dans d'autres domaines, y compris la communication, les troubles visuo-spatiaux, et la négligence chez les personnes qui ont subi un AVC et qui souffrent de déficits cognitifs d'origine vasculaire.*

#### **2.4 Pharmacothérapie pour les déficits cognitifs d'origine vasculaire après un AVC**

- i. Pour les personnes qui manifestent des déficits cognitifs d'origine vasculaire après un AVC, on doit envisager une orientation vers un professionnel ou une équipe de santé possédant des compétences en déficits cognitifs d'origine vasculaire, afin d'obtenir une évaluation supplémentaire et des recommandations sur la pharmacothérapie [niveau de preuve C].
- ii. On peut envisager les inhibiteurs de la cholinestérase (donépézil, rivastigmine et galantamine) et la mémantine, antagoniste du récepteur N-méthyl-D-aspartate (NMDA) chez les personnes victimes d'un AVC et atteintes de démence vasculaire ou de démence mixte, d'après des essais randomisés indiquant des bienfaits légèrement positifs dans les résultats cognitifs [niveau de preuve A]. *Consultez le facteur clinique iv ci-dessous pour en savoir plus.*

*Remarque : Ces médicaments sont actuellement autorisés par Santé Canada pour le traitement de la maladie d'Alzheimer. Ils n'ont pas reçu d'approbation dans le cas d'une indication de déficits cognitifs d'origine vasculaire.*

#### **Facteurs cliniques associés à la pharmacothérapie pour les déficits cognitifs d'origine vasculaire**

- i. On doit noter que la plupart des données probantes disponibles sont fondées sur des personnes qui répondent aux critères pour la démence vasculaire ou la démence mixte. En conséquence, les données sur les effets du traitement pharmacologique dans les cas de déficits cognitifs d'origine vasculaire sont limitées actuellement.
- ii. On doit tenir compte de la sévérité des déficits cognitifs en prenant une décision dans le cadre de la gestion pharmacologique.
- iii. Les personnes atteintes de déficits cognitifs d'origine vasculaire après un AVC pourraient être susceptibles à des effets secondaires étant donné les comorbidités médicales fréquentes et l'utilisation concomitante de médicaments.
- iv. La pertinence clinique des bienfaits des inhibiteurs de la cholinestérase (donépézil, rivastigmine et galantamine) et la mémantine, antagoniste du récepteur NMDA demeure controversée, particulièrement en raison du risque d'effets secondaires et de la possibilité de

risque accru de mortalité. En conséquence, l'utilisation de ces médicaments doit être fondée sur un jugement clinique selon lequel de petites améliorations cognitives pourraient avoir un impact significatif sur la qualité de vie de la personne ayant subi un AVC.

### **SECTION 3 : RECOMMANDATIONS EN MATIÈRE DE FATIGUE APRÈS UN AVC**

La fatigue après un AVC est une séquelle courante qui nuit au rétablissement, qui est source de frustration et qui est souvent ignorée. La ou les causes sous-jacentes de la fatigue après un AVC sont encore très peu comprises, mais reposent probablement sur des facteurs biologiques, psychosociaux et comportementaux<sup>84</sup>. Les personnes qui ressentent de la fatigue après un AVC rapportent avoir moins de capacités et d'énergie, ressentir un épuisement anormal et éprouver le besoin irrésistible de dormir plus longtemps. Elles disent également se fatiguer facilement, être plus sensibles au stress et ressentir de la fatigue pour laquelle il n'y a pas de cause ou d'explication évidente<sup>85</sup>. Les estimations de l'incidence et de la prévalence varient en fonction du moment auquel la fatigue est évaluée au cours du processus de rétablissement et de l'outil d'évaluation utilisé. Une étude effectuée par Cumming et coll.<sup>7</sup> a comparé les résultats de 22 études, dans lesquelles un seuil  $\geq 4$  ou  $> 4$  sur la Fatigue Severity Scale (FSS) [échelle d'évaluation de l'intensité de la fatigue] a été utilisé. La prévalence de la fatigue après un AVC était de 50 % (évaluée jusqu'à six ans après l'AVC). Comme le tableau clinique de la fatigue après un AVC n'est pas bien défini, on ignore si la fatigue augmente ou diminue au fil du temps. Les résultats d'un examen systématique qui se basait sur les résultats de neuf études ont indiqué que le pourcentage des patients ayant signalé ressentir de la fatigue a à la fois augmenté et diminué entre la première et la deuxième période d'évaluation<sup>86</sup>. Par contre, les

estimations quant à la prévalence de la fatigue sont restées relativement stables au fil du temps (55 % durant les trois mois suivant l'AVC, 46 % entre le premier et le sixième mois et 53 % après six mois)<sup>7</sup>.

Peu de traitements pour la fatigue après un AVC ont été évalués. En utilisant les résultats de sept essais (cinq essais pharmacologiques et deux non pharmacologiques), une revue systématique Cochrane<sup>87</sup> a établi que, de façon générale, les traitements entraînaient une réduction considérable des scores de fatigue (différence des moyennes pondérées = -1,07; intervalle de confiance à 95 % [-1,93 à -0,21]; valeur de  $p = 0,014$ ). Les agents pharmacologiques qui ont été évalués dans le traitement de la fatigue après un AVC comprennent les inhibiteurs sélectifs de la recapture de la sérotonine (fluoxétine) et le modafinil. Dans l'essai Modafinil in Debilitating Fatigue After Stroke [utilisation de modafinil pour le traitement de la fatigue débilitante], 36 participants souffrant de fatigue après un AVC ont reçu 200 mg de modafinil ou un placebo, et ce, pendant six semaines<sup>88</sup>. Un traitement actif avec du modafinil a été associé à une réduction considérable des mesures de la fatigue (scores totaux de l'inventaire multidimensionnel de la fatigue [IMF] à 20 énoncés [différence moyenne = -7,38; intervalle de confiance à 95 % [-21,76 à -2,99]; valeur de  $p = < 0,001$ ], scores moyens de la FSS [différence moyenne = -6,31; intervalle de confiance à 95 % [-10,7 à -1,9]; valeur de  $p = 0,048$ ]) et à une augmentation considérable des scores moyens totaux de la Stroke Specific Quality Of Life Scale (échelle d'évaluation de la qualité de vie après un AVC) [différence moyenne = 11,8; intervalle de confiance à 95 % [2,3 à 21,3]; valeur de  $p = 0,015$ ]. Dans un autre essai clinique randomisé, 41 personnes souffrant de fatigue après un AVC ont été réparties de façon aléatoire dans différents groupes et ont reçu 400 mg de modafinil pendant 90 jours. Les résultats étaient ambigus. Après 90 jours, il n'y avait pas de différence notable entre les groupes en ce qui concerne le score médian de la fatigue générale de l'IMF à 20 énoncés (11 pour les personnes ayant reçu du modafinil et 14 pour les personnes ont reçu un placebo; valeur de  $p = 0,32$ ) ou le score médian dans les autres domaines de l'IMF (fatigue physique, activité réduite, motivation réduite); toutefois, le score médian des échelles FSS et FSS à sept énoncés était considérablement plus bas après 90 jours chez les patients du groupe ayant reçu du modafinil (36 contre 49,5; valeur de  $p = 0,02$ ; et 22 contre 37,5; valeur de  $p = 0,042$ )<sup>89</sup>. La fluoxétine a été examinée dans le cadre d'un essai avec 83 participants souffrant de troubles émotionnels après un AVC, en moyenne 14 mois après le début des symptômes de l'AVC<sup>90</sup>. Les patients ont reçu de façon aléatoire 20 mg de fluoxétine par jour ou un placebo, pendant trois mois. À la fin du traitement, aucune différence notable n'a pu être observée quant au nombre de patients souffrant de fatigue après un AVC. Après six mois, 34 patients (85 %) du groupe recevant de la fluoxétine ont signalé ressentir de la fatigue, comparativement à 40 (93 %) dans le groupe témoin. Toutefois, après trois mois, moins de patients ont signalé avoir pleuré de façon excessive ou incompréhensible dans le groupe recevant de la fluoxétine que dans le groupe témoin (40 % contre 62,8 %; valeur de  $p = 0,038$ ) et, après six mois, moins de patients ont reçu un diagnostic de dépression dans le groupe recevant de la fluoxétine que dans le groupe témoin (12,5 % contre 30,2 %; valeur de  $p = 0,05$ ). Parmi les essais évaluant des traitements non pharmacologiques pour la fatigue après un AVC,

deux ont permis l'observation d'une amélioration considérable des symptômes. Dans le cadre d'un programme de douze semaines, Zedlitz et coll.<sup>91</sup> ont réparti en deux groupes de façon aléatoire 83 participants ressentant une fatigue intense plus de quatre mois après l'AVC : un groupe recevant un traitement cognitif (groupe témoin) et un groupe recevant un traitement cognitif combiné à un entraînement physique noté. Le traitement cognitif prenait la forme d'une thérapie cognitivo-comportementale et de l'enseignement d'une stratégie de compensation. Les patients du groupe suivant un entraînement physique noté ont également participé à 24 séances d'activité physique notées, chacune d'une durée de deux heures, qui incluaient le tapis roulant, des exercices de musculation et des devoirs à faire à la maison. Les participants qui ont suivi l'entraînement physique noté étaient nettement plus susceptibles de voir des améliorations cliniques en ce qui concerne la sévérité de la fatigue ressentie (57,9 % contre 24,4 %; valeur de  $p = 0,002$ ). Johansson et coll.<sup>92</sup> ont indiqué que, dans le cadre de leur étude proposant un programme de huit semaines de réduction du stress par la pleine conscience, les patients ayant des symptômes de fatigue mentale après un AVC ont obtenu des scores considérablement plus bas sur la Mental Fatigue Scale (échelle de la fatigue mentale) que le groupe témoin sur la liste d'attente. Il a été établi que la ventilation spontanée en pression positive continue réduisait considérablement les scores sur l'échelle de somnolence d'Epworth comparativement aux soins habituels prodigués dans l'essai Sleep Apnea Cardiovascular Endpoints (SAVE) [paramètres cardiovasculaires de l'apnée du sommeil]<sup>93</sup>. Parmi les interventions non pharmacologiques qui ont été évaluées pour le traitement de la fatigue après un AVC et qui ne se sont pas révélées efficaces figurent un programme d'éducation sur la gestion de la fatigue<sup>94</sup> et un programme de six mois d'autogestion des maladies chroniques<sup>95</sup>.

### 3. Fatigue après un AVC 2019

#### Définitions et descriptions

**Fatigue après un AVC** : La fatigue après un AVC est une expérience émotionnelle, cognitive, motrice, perceptuelle et multidimensionnelle consistant à ressentir rapidement de la fatigue, de la lassitude, une absence d'énergie et une aversion à l'effort qui se développent durant une activité physique ou mentale et qui ne disparaissent pas après une période de repos. La fatigue peut être objective ou subjective; la fatigue objective est définie comme la diminution observable et mesurable de la performance qui survient lors de la répétition d'une tâche physique ou mentale, alors que la fatigue subjective consiste à ressentir rapidement de la fatigue, de la lassitude et une aversion à l'effort (Acciarresi et coll., 2014; Staub, 2001; Annoni, 2008; Lerdal, 2009; Eskes, 2011).

Les **caractéristiques** de la fatigue après un AVC comprennent notamment une fatigue et une absence d'énergie disproportionnées pour exécuter les tâches de la vie quotidienne; un besoin anormal de siestes ou de périodes de repos, ou de sommeil prolongé; le fait d'être plus facilement fatigué par des activités qu'avant l'AVC; une fatigue non prévisible ressentie sans raison apparente.

**3.0** La fatigue après un AVC est un problème courant qui peut survenir après un AVC à n'importe quel moment du processus de rétablissement. La fatigue après un AVC passe souvent inaperçue. Par conséquent, les professionnels de la santé doivent prévoir la possibilité de fatigue après un AVC,

et préparer les personnes qui ont subi un AVC et leur famille à atténuer la fatigue en évaluant, éduquant et intervenant à n'importe quel moment dans le continuum de rétablissement après un AVC [niveau de preuve B].

*Remarque : La fatigue après un AVC ne semble pas corrélée avec la sévérité de l'AVC. Les personnes qui ont subi un AVC très mineur peuvent tout de même ressentir de la fatigue.*

### 3.1 Dépistage et évaluation

- i. Avant d'accorder un congé du service de soins aigus ou de la réadaptation en milieu hospitalier, il faut fournir à la personne qui a subi un AVC, à sa famille et aux aidants des renseignements de base sur l'éventualité de la fatigue après un AVC [niveau de preuve C].
- ii. Après le retour dans la communauté, les personnes qui ont subi un AVC doivent être soumises régulièrement à un dépistage de la fatigue après un AVC durant les consultations médicales de suivi (p. ex., soins primaires, soins à domicile, cliniques de prévention extrahospitalières ou de réadaptation) [niveau de preuve C]. *Veillez consulter le tableau 3A à l'annexe 2 pour un résumé des outils de dépistage proposés.*
- iii. Les personnes qui éprouvent de la fatigue après l'AVC doivent être soumises à un dépistage de comorbidités communes après un AVC et traitables, et de médicaments qui sont associés à la fatigue et/ou l'aggravent, y compris [niveau de preuve B] :
  - a. signes de dépression ou d'autres problèmes associés à l'humeur; troubles du sommeil ou facteurs qui réduisent la qualité du sommeil (p. ex., apnée du sommeil, douleur); autres problèmes médicaux courants après un AVC, et médicaments qui augmentent la fatigue (p. ex., pour une infection systémique telle que l'infection des voies urinaires, la déshydratation, les médicaments à effet sédatif et l'hypothyroïdie).

### 3.2 Gestion de la fatigue après un AVC

- i. Les personnes ayant subi un AVC doivent recevoir des soins prodigués par des professionnels de la santé habilités à reconnaître les symptômes de fatigue et leur prise en charge [niveau de preuve C].
- ii. Des données probantes limitées suggèrent que le traitement pharmacologique de la fatigue après un AVC avec du modafinil peut être envisagé chez certaines personnes qui ont subi un AVC [niveau de preuve C]. D'autres recherches sont nécessaires afin de comprendre pleinement les avantages de ce traitement.
- iii. Il n'y a pas pour le moment suffisamment de données probantes qui permettraient de formuler une recommandation précise d'antidépresseurs pour la fatigue après un AVC [niveau de preuve B].
- iv. La psychothérapie (thérapie cognitivo-comportementale) peut être envisagée comme traitement complémentaire de la fatigue après un AVC [niveau de preuve B].
- v. La réduction du stress par la pleine conscience peut être envisagée comme traitement complémentaire de la fatigue après un AVC [niveau de preuve B].
- vi. Il est recommandé d'obtenir des conseils sur des exercices réguliers progressifs comportant des exigences physiques croissantes appropriées au niveau de tolérance, afin de prévenir le déconditionnement et d'améliorer la tolérance physique [niveau de preuve C].

- vii. Il est recommandé d'obtenir des conseils sur des stratégies de conservation de l'énergie visant à optimiser la fonction quotidienne dans les activités prioritaires (p. ex., les routines quotidiennes et les tâches modifiées qui prévoient des besoins énergétiques et offrent un équilibre activité/repos) [niveau de preuve C]. *Veillez consulter [la case 3](#) pour obtenir des exemples de stratégies de conservation de l'énergie.*
- viii. Il est recommandé d'obtenir des conseils sur des comportements favorisant une bonne hygiène du sommeil [niveau de preuve B].
- ix. L'éducation nécessaire doit être offerte aux personnes qui ont subi un AVC, à leur famille et aux aidants en ce qui concerne la gestion du temps et la planification d'un équilibre d'activités et de périodes de repos [niveau de preuve C].
- x. Les personnes qui ont subi un AVC et qui ressentent de la fatigue doivent communiquer leurs besoins en état énergétique et repos aux professionnels de la santé, aux membres de la famille, aux aidants, aux employeurs et aux groupes sociaux [niveau de preuve C].

### **Case 3 : Exemples de stratégies de conservation d'énergie particulières**

*La liste suivante inclut des stratégies de conservation d'énergie décrites dans une base de documentation élargie. Elles sont offertes à titre d'information et d'orientation pour conseiller les personnes qui ont subi un AVC. Elles ne doivent pas être considérées comme des recommandations fondées sur des données probantes.*

- Structurer la journée pour inclure un équilibre d'activités et de périodes de repos fixées à l'avance. Prévoir des exigences énergétiques pour chaque tâche et pour terminer des activités hautement prioritaires;
- Tenir un agenda des activités quotidiennes et faire en sorte que les activités physiquement exigeantes viennent après une période de repos, planifier les activités une journée à l'avance, prévoir le niveau d'énergie qu'exige chaque tâche, établir des priorités parmi les tâches et la dépense d'énergie qu'elles représentent;
- Organiser son milieu physique afin de réduire l'effort lié aux déplacements, réduire la fréquence d'utilisation des escaliers et avoir à portée de la main les objets les plus souvent utilisés;
- Adopter la position assise plutôt que la position debout lorsque c'est possible pour certaines tâches (comme repasser ou laver la vaisselle);
- Comprendre comment utiliser de façon appropriée la mécanique de l'organisme, les positions à privilégier, les positions assises et les emplacements (se reposer dans un lit plutôt que sur une chaise);
- Acquérir de bonnes habitudes d'hygiène du sommeil et éviter les médicaments sédatifs et une consommation excessive d'alcool;
- Utiliser de l'équipement et des technologies de conservation de l'énergie afin de réduire l'effort physique (p. ex., ouvre-boîte électrique, magasinage en ligne);
- Choisir des activités professionnelles et de loisirs agréables qui sont prévues pour s'assurer que le patient a eu le temps de se reposer au préalable;
- Confier à d'autres l'exécution de certaines tâches qui ne sont pas prioritaires ou dont quelqu'un d'autre (comme un membre de la famille) peut s'acquitter;
- Élaborer un régime alimentaire de saine alimentation qui favorise les niveaux d'énergie.

## Orientations futures

Les changements et les troubles d'humeur, les déficits cognitifs et la fatigue sont des défis de taille à la suite d'un AVC. En effet, ils freinent le rétablissement et entraînent des séquelles plus importantes chez les personnes aux prises avec de telles difficultés. Devant ce constat, il est essentiel d'effectuer le dépistage et l'évaluation de ces trois problèmes de santé, en plus d'en assurer une gestion adéquate. Il faut être vigilant et essayer de repérer leur présence dès la phase de soins de courte durée, en particulier si le patient a des antécédents à cet égard. Par ailleurs, les répercussions ne se font pas uniquement sentir dans la capacité à se rétablir; nous observons maintenant aussi des répercussions sur le plan sociétal. Pour les personnes qui travaillent, un AVC peut entraîner la perte d'un emploi et la réduction des revenus. Une récente étude canadienne a permis d'observer une baisse de 19,8 % des personnes retournées au travail trois ans après avoir été hospitalisées pour un AVC aigu, ce qui se traduit par une réduction moyenne de 13 278 \$ en revenus annuels<sup>100</sup>.

Compte tenu du vieillissement de la population et de l'augmentation attendue des cas d'AVC, nous devons adopter une approche dynamique en amont. Des mesures de prévention primaire pour réduire les facteurs de risque cardiovasculaires, comme des interventions multidisciplinaires en matière d'alimentation et de mode de vie, peuvent se révéler efficaces chez les personnes âgées. Dans l'essai de prévention primaire Finnish Geriatric Intervention Study to Prevent Cognitive Impairment and Disability<sup>101</sup> (FINGER) [intervention gériatrique finlandaise pour prévenir les incapacités et les déficits cognitifs], qui comprenait de l'entraînement cognitif en plus d'une modification de l'alimentation et du mode de vie, le score combiné des tests de fonction cognitive s'était considérablement amélioré après deux ans dans le groupe d'intervention. Toutefois, des essais similaires, comme le Multidomain Alzheimer Preventive Trial<sup>102</sup> (MAPT) [essai multidisciplinaire de prévention de l'alzheimer] et le Prevention of Dementia by Intensive Vascular care<sup>103</sup> (preDIVA) [prévention de la démence grâce à des soins intensifs pour la santé vasculaire] – qui n'avait pas de volet d'entraînement cognitif –, n'ont pas permis de prévenir le déclin cognitif ou le développement de la démence chez les personnes âgées. Le régime méditerranéen accompagné de la consommation d'huile d'olive extra vierge a permis de réduire considérablement le risque de déficit cognitif léger chez les personnes présentant un risque cardiovasculaire élevé lors de l'essai Prevención con Dieta Mediterránea (PREDIMED) [prévention avec le régime méditerranéen]<sup>104</sup>. De plus, il a été démontré que l'adoption d'un mode de vie sain (maintenir un poids normal, avoir une alimentation saine, ne pas fumer, faire régulièrement de l'activité physique, garder le taux de cholestérol, la tension artérielle et la glycémie à jeun aux niveaux visés) au début de l'âge adulte préservait la fonction cognitive plus tard au cours de la vie<sup>105</sup>.

La science continue de trouver d'autres façons de diagnostiquer et de traiter la démence, comme l'aducanumab, un anticorps monoclonal qui cible et lie certaines plaques constituées d'agrégat de bêta-amyloïde et qui réduit leur concentration dans le cerveau des personnes ayant des symptômes légers de la maladie d'Alzheimer<sup>106</sup>. Dans le futur, s'il est possible d'identifier des biomarqueurs génétiques de la démence plus spécifiques, cela aurait le potentiel

d'affiner les diagnostics, de fournir des données pronostiques plus justes et d'élaborer des thérapies plus ciblées.

## Résumé

L'édition 2019 des *Recommandations canadiennes pour les pratiques optimales de soins de l'AVC : Humeur, cognition et fatigue après un AVC* fournit un ensemble d'énoncés fondés sur des données probantes et formulés à l'intention des professionnels de la santé et des dirigeants du système de santé, afin d'orienter la gestion des trois problèmes de santé les plus courants après un AVC et de veiller à ce que les structures et ressources nécessaires soient en place. Bien que la dépression, les déficits cognitifs et la fatigue soient tous très courants après un AVC et qu'ils aient le potentiel de nuire au rétablissement, ils sont souvent négligés lors des soins. Les recommandations soulignent l'importance des pratiques de dépistage et d'évaluation, et encouragent leur intégration dans les protocoles existants en matière d'AVC, particulièrement dans les étapes post-aiguës des soins. Pour réaliser cet objectif, il faut renforcer les capacités du système de santé pour s'assurer que les personnes vivant avec les séquelles d'un AVC ont accès aux spécialistes appropriés, qui pourront détecter ces problèmes et y remédier. Bien qu'il y ait actuellement peu de traitements efficaces pour ces problèmes de santé (comparativement à d'autres aspects des soins de l'AVC), le présent document fait mention de nouvelles thérapies pharmacologiques et non pharmacologiques qui pourraient faire partie de la pratique clinique courante si les données probantes quant à leur innocuité et à leurs avantages continuent d'augmenter.

Les *Recommandations canadiennes pour les pratiques optimales de soins de l'AVC* continuent d'évoluer. Elles sont mises à jour tous les deux ou trois ans, un processus lors duquel de nouvelles recommandations sont formulées et les anciennes sont révisées ou supprimées, selon les nouvelles données probantes disponibles.

## Remerciements

La fondation remercie sincèrement les chefs et les membres du groupe de rédaction sur l'humeur, la cognition et la fatigue après un AVC, qui ont donné de leur temps et fait appel à leurs connaissances dans le but de mettre à jour les recommandations. Ces dernières ont fait l'objet d'une révision externe par : Angela Taylor, Christian Bocti, Fatima Quraishi, Frans Verhey, Gail Eskes, Geert Jan Biessels, Isabelle Martineau, Jennifer Mandzia, Lee-Anne Greer, Ronak Patal, Sandeep Subramanian, Taylor McMillan, et Teresa Liu-Ambrose. Nous remercions les membres du Comité consultatif canadien sur les pratiques optimales en matière de soins de l'AVC et du Comité consultatif canadien sur la qualité des soins de l'AVC, notamment Eric Smith, Anita Mountain, Leanne Casaubon, Gord Gubitz, Dar Dowlatshahi, Dylan Blacchiere, Thalia Field, Farrell Leibovitch, Christine Papoushek, Jeffrey Habert, Barbara Campbell, Joyce Fung, Michael Hill, Tim Hillier, Thomas Jeerakathil, Eddy Lang, Pascale Lavoie, Beth Linkewich, Colleen O'Connell, Melanie Penn, Jai Shankar, Debbie Timpson, Theodore Wein et Katie White. Nous remercions aussi Norine Foley, Sanjit Bhogal et l'équipe d'analyse des preuves chez workHORSE, ainsi que les équipes internes de Cœur + AVC qui ont contribué à l'élaboration et à la publication des recommandations : les équipes des communications, des services linguistiques, du transfert des connaissances, des politiques en matière de santé et du numérique.

## Déclaration de conflits d'intérêts

Les auteurs suivants ont déclaré être dans une situation de conflit d'intérêts : les travaux de recherche de Krista Lancôt (coauteure principale) ont été financés par AbbVie et Pfizer; elle a également reçu des honoraires de consultation d'AbbVie, de Lundbeck, de Merck et d'Otsuka, ainsi que des subventions des National Institutes of Health, des Instituts de recherche en santé du Canada, de la Société Alzheimer du Canada, de la Alzheimer's Association et de la Alzheimer's Drug Discovery Foundation. Le Dr Richard Swartz (coauteur principal) est récipiendaire d'une bourse de nouveau chercheur de Cœur + AVC et d'une bourse de recherche Barnett; ses travaux de recherche sont financés par les Instituts de recherche en santé du Canada, Cœur + AVC, l'Association des professionnels en philanthropie et le département de médecine du Centre des sciences de la santé Sunnybrook, et Hoffman-La Roche Limited; il est conférencier pour l'alliance Bristol-Myers Squibb et Pfizer; il a publié des méthodes de dépistage de la dépression, de l'apnée obstructive du sommeil et des déficits cognitifs (« DOC Screen ») auprès des populations des cliniques spécialisées en AVC. Ces méthodes de dépistage sont accessibles en ligne gratuitement, il n'y a donc pas de conflit d'intérêts financier, mais il existe un conflit potentiel de reconnaissance universitaire ou une apparence de conflit professionnel. Les autres auteurs n'ont pas de conflits d'intérêts à déclarer.

## Financement

La fondation a financé l'intégralité de l'élaboration des *Recommandations*. Aucun financement pour le présent document ne provient d'intérêts commerciaux, y compris des sociétés pharmaceutiques et de dispositifs médicaux. Les membres des groupes de rédaction et les examinateurs externes sont des bénévoles et n'ont reçu aucune rémunération pour leur participation à l'élaboration, à l'actualisation et à l'examen des lignes directrices. Toutes les personnes impliquées dans le projet rédigent une déclaration de conflit d'intérêts avant de participer.

## References

1. Feigin VL, Norrving B and Mensah GA. Global Burden of Stroke. *Circulation research*. 2017; 120: 439-48.
2. Katsanos AH, Spence JD, Bogiatzi C, et al. Recurrent stroke and patent foramen ovale: a systematic review and meta-analysis. *Stroke*. 2014; 45: 3352-9.
3. Leary MC and Saver JL. Annual incidence of first silent stroke in the United States: a preliminary estimate. *Cerebrovascular diseases (Basel, Switzerland)*. 2003; 16: 280-5.
4. Krueger H, Koot J, Hall RE, O'Callaghan C, Bayley M and Corbett D. Prevalence of Individuals Experiencing the Effects of Stroke in Canada: Trends and Projections. *Stroke*. 2015; 46: 2226-31.
5. Hackett ML and Pickles K. Part I: frequency of depression after stroke: an updated systematic review and meta-analysis of observational studies. *International journal of stroke : official journal of the International Stroke Society*. 2014; 9: 1017-25.
6. Pendlebury ST, Chen PJ, Welch SJ, et al. Methodological Factors in Determining Risk of Dementia After Transient Ischemic Attack and Stroke: (II) Effect of Attrition on Follow-Up. *Stroke*. 2015; 46: 1494-500.
7. Cumming TB, Packer M, Kramer SF and English C. The prevalence of fatigue after stroke: A systematic review and meta-analysis. *International journal of stroke : official journal of the International Stroke Society*. 2016; 11: 968-77.
8. MacIntosh BJ, Edwards JD, Kang M, et al. Post-stroke Fatigue and Depressive Symptoms Are Differentially Related to Mobility and Cognitive Performance. *Frontiers in aging neuroscience*. 2017; 9: 343.
9. Ismail Z, Elbayoumi H, Fischer CE, et al. Prevalence of Depression in Patients With Mild Cognitive Impairment: A Systematic Review and Meta-analysis. *JAMA psychiatry*. 2017; 74: 58-67.
10. Mourao RJ, Mansur G, Malloy-Diniz LF, Castro Costa E and Diniz BS. Depressive symptoms increase the risk of progression to dementia in subjects with mild cognitive impairment: systematic review and meta-analysis. *International journal of geriatric psychiatry*. 2016; 31: 905-11.
11. Swartz RH, Cayley ML, Lanctot KL, et al. The "DOC" screen: Feasible and valid screening for depression, Obstructive Sleep Apnea (OSA) and cognitive impairment in stroke prevention clinics. *PloS one*. 2017; 12: e0174451.
12. Barritt AW and Smithard DG. Targeting fatigue in stroke patients. *ISRN neurology*. 2011; 2011: 805646.

13. Kutlubaev MA and Hackett ML. Part II: predictors of depression after stroke and impact of depression on stroke outcome: an updated systematic review of observational studies. *International journal of stroke : official journal of the International Stroke Society*. 2014; 9: 1026-36.
14. Jewett L, Harroud A, Hill MD, et al. Secondary stroke prevention services in Canada: a cross-sectional survey and geospatial analysis of resources, capacity and geographic access. *CMAJ open*. 2018; 6: E95-e102.
15. (Dis)connected: How unseen links are putting us at risk. 2019 Report on Heart, Stroke and Vascular Cognitive Impairment. <https://www.heartandstroke.ca/-/media/pdf-files/canada/2019-report/heartandstrokereport2019.ashx>.
16. Graham ID, Harrison MB, Brouwers M, Davies BL and Dunn S. Facilitating the use of evidence in practice: evaluating and adapting clinical practice guidelines for local use by health care organizations. *Journal of obstetric, gynecologic, and neonatal nursing : JOGNN*. 2002; 31: 599-611.
17. Vernooij RW, Alonso-Coello P, Brouwers M and Martinez Garcia L. Reporting Items for Updated Clinical Guidelines: Checklist for the Reporting of Updated Guidelines (CheckUp). *PLoS medicine*. 2017; 14: e1002207.
18. Hebert D, Lindsay MP, McIntyre A, et al. Canadian stroke best practice recommendations: Stroke rehabilitation practice guidelines, update 2015. *International journal of stroke : official journal of the International Stroke Society*. 2016; 11: 459-84.
19. Cameron JI, O'Connell C, Foley N, et al. Canadian Stroke Best Practice Recommendations: Managing transitions of care following Stroke, Guidelines Update 2016. *International journal of stroke : official journal of the International Stroke Society*. 2016; 11: 807-22.
20. Jorgensen TS, Wium-Andersen IK, Wium-Andersen MK, et al. Incidence of Depression After Stroke, and Associated Risk Factors and Mortality Outcomes, in a Large Cohort of Danish Patients. *JAMA psychiatry*. 2016; 73: 1032-40.
21. Guiraud V, Gallarda T, Calvet D, et al. Depression predictors within six months of ischemic stroke: The DEPRESS Study. *International journal of stroke : official journal of the International Stroke Society*. 2016; 11: 519-25.
22. Ayerbe L, Ayis S, Wolfe CD and Rudd AG. Natural history, predictors and outcomes of depression after stroke: systematic review and meta-analysis. *The British journal of psychiatry : the journal of mental science*. 2013; 202: 14-21.
23. Bartoli F, Lillia N, Lax A, et al. Depression after stroke and risk of mortality: a systematic review and meta-analysis. *Stroke research and treatment*. 2013; 2013: 862978.
24. Karamchandani RR, Vahidy F, Bajgur S, et al. Early depression screening is feasible in hospitalized stroke patients. *PloS one*. 2015; 10: e0128246.

25. Meader N, Moe-Byrne T, Llewellyn A and Mitchell AJ. Screening for poststroke major depression: a meta-analysis of diagnostic validity studies. *Journal of neurology, neurosurgery, and psychiatry*. 2014; 85: 198-206.
26. Xu XM, Zou DZ, Shen LY, et al. Efficacy and feasibility of antidepressant treatment in patients with post-stroke depression. *Medicine*. 2016; 95: e5349.
27. Hackett ML, Anderson CS, House A and Halteh C. Interventions for preventing depression after stroke. *The Cochrane database of systematic reviews*. 2008; 10.1002/14651858.CD003689.pub3: Cd003689.
28. Chen Y, Guo JJ, Zhan S and Patel NC. Treatment effects of antidepressants in patients with post-stroke depression: a meta-analysis. *The Annals of pharmacotherapy*. 2006; 40: 2115-22.
29. Chollet F, Tardy J, Albucher JF, et al. Fluoxetine for motor recovery after acute ischaemic stroke (FLAME): a randomised placebo-controlled trial. *The Lancet Neurology*. 2011; 10: 123-30.
30. Effects of fluoxetine on functional outcomes after acute stroke (FOCUS): a pragmatic, double-blind, randomised, controlled trial. *Lancet (London, England)*. 2018; 10.1016/s0140-6736(18)32823-x.
31. Hackett ML, Yang M, Anderson CS, Horrocks JA and House A. Pharmaceutical interventions for emotionalism after stroke. *The Cochrane database of systematic reviews*. 2010; 10.1002/14651858.CD003690.pub3: Cd003690.
32. Salter KL, Foley NC, Zhu L, Jutai JW and Teasell RW. Prevention of poststroke depression: does prophylactic pharmacotherapy work? *Journal of stroke and cerebrovascular diseases : the official journal of National Stroke Association*. 2013; 22: 1243-51.
33. Yi ZM, Liu F and Zhai SD. Fluoxetine for the prophylaxis of poststroke depression in patients with stroke: a meta-analysis. *International journal of clinical practice*. 2010; 64: 1310-7.
34. Mitchell PH, Veith RC, Becker KJ, et al. Brief psychosocial-behavioral intervention with antidepressant reduces poststroke depression significantly more than usual care with antidepressant: living well with stroke: randomized, controlled trial. *Stroke*. 2009; 40: 3073-8.
35. Thomas SA, Walker MF, Macniven JA, Haworth H and Lincoln NB. Communication and Low Mood (CALM): a randomized controlled trial of behavioural therapy for stroke patients with aphasia. *Clinical rehabilitation*. 2013; 27: 398-408.
36. Zhang ZJ, Chen HY, Yip KC, Ng R and Wong VT. The effectiveness and safety of acupuncture therapy in depressive disorders: systematic review and meta-analysis. *Journal of affective disorders*. 2010; 124: 9-21.
37. Shen X, Liu M, Cheng Y, et al. Repetitive transcranial magnetic stimulation for the treatment of post-stroke depression: A systematic review and meta-analysis of randomized controlled clinical trials. *Journal of affective disorders*. 2017; 211: 65-74.

38. Valiengo LC, Goulart AC, de Oliveira JF, Bensenor IM, Lotufo PA and Brunoni AR. Transcranial direct current stimulation for the treatment of post-stroke depression: results from a randomised, sham-controlled, double-blinded trial. *Journal of neurology, neurosurgery, and psychiatry*. 2017; 88: 170-5.
39. Eng JJ and Reime B. Exercise for depressive symptoms in stroke patients: a systematic review and meta-analysis. *Clinical rehabilitation*. 2014; 28: 731-9.
40. Depressive Disorders. *Diagnostic and Statistical Manual of Mental Disorders Washington, DC* Washington, DC2013.
41. Robinson RG and Jorge RE. Post-Stroke Depression: A Review. *The American journal of psychiatry*. 2016; 173: 221-31.
42. Taylor WD, Steffens DC, MacFall JR, et al. White matter hyperintensity progression and late-life depression outcomes. *Archives of general psychiatry*. 2003; 60: 1090-6.
43. Sachdev PS. Post-Stroke Cognitive Impairment, Depression and Apathy: Untangling the Relationship. *The American journal of geriatric psychiatry : official journal of the American Association for Geriatric Psychiatry*. 2018; 26: 301-3.
44. Chen L, Xiong S, Liu Y, et al. Comparison of Motor Relearning Program versus Bobath Approach for Prevention of Poststroke Apathy: A Randomized Controlled Trial. *Journal of stroke and cerebrovascular diseases : the official journal of National Stroke Association*. 2019; 28: 655-64.
45. Marin RS. Apathy: a neuropsychiatric syndrome. *The Journal of neuropsychiatry and clinical neurosciences*. 1991; 3: 243-54.
46. van Dalen JW, Moll van Charante EP, Nederkoorn PJ, van Gool WA and Richard E. Poststroke apathy. *Stroke*. 2013; 44: 851-60.
47. Cameron J and O'Connell C. on behalf of the Managing Stroke Transitions of Care Writing Group. Managing Transitions of Care Following Stroke 2015. In Lindsay MP, Gubitz G, Bayley M, and Smith EE (Editors) on behalf of the Canadian Stroke Best Practices and Advisory Committee. Canadian Stroke Best Practice Recommendations, 2015; Ottawa, Ontario Canada: Heart and Stroke Foundation.
48. Hebert D and Teaseel R. on behalf of the Stroke Rehabilitation Writing Group. Stroke Rehabilitation Module 2015. In Lindsay MP, Gubitz G, Bayley M, and Smith EE (Editors) on behalf of the Canadian Stroke Best Practices and Advisory Committee. Canadian Stroke Best Practice Recommendations, 2015; Ottawa, Ontario Canada: Heart and Stroke Foundation.
49. Douiri A, Rudd AG and Wolfe CD. Prevalence of poststroke cognitive impairment: South London Stroke Register 1995-2010. *Stroke*. 2013; 44: 138-45.
50. Bejot Y, Aboa-Eboule C, Durier J, et al. Prevalence of early dementia after first-ever stroke: a 24-year population-based study. *Stroke*. 2011; 42: 607-12.

51. Pendlebury ST and Rothwell PM. Prevalence, incidence, and factors associated with pre-stroke and post-stroke dementia: a systematic review and meta-analysis. *The Lancet Neurology*. 2009; 8: 1006-18.
52. Cumming TB, Churilov L, Linden T and Bernhardt J. Montreal Cognitive Assessment and Mini-Mental State Examination are both valid cognitive tools in stroke. *Acta neurologica Scandinavica*. 2013; 128: 122-9.
53. Lees R, Selvarajah J, Fenton C, et al. Test accuracy of cognitive screening tests for diagnosis of dementia and multidomain cognitive impairment in stroke. *Stroke*. 2014; 45: 3008-18.
54. Bath PM, Scutt P, Blackburn DJ, et al. Intensive versus Guideline Blood Pressure and Lipid Lowering in Patients with Previous Stroke: Main Results from the Pilot 'Prevention of Decline in Cognition after Stroke Trial' (PODCAST) Randomised Controlled Trial. *PloS one*. 2017; 12: e0164608.
55. Matz K, Teuschl Y, Firlinger B, et al. Multidomain Lifestyle Interventions for the Prevention of Cognitive Decline After Ischemic Stroke: Randomized Trial. *Stroke*. 2015; 46: 2874-80.
56. Zonneveld TP, Richard E, Vergouwen MD, et al. Blood pressure-lowering treatment for preventing recurrent stroke, major vascular events, and dementia in patients with a history of stroke or transient ischaemic attack. *The Cochrane database of systematic reviews*. 2018; 7: Cd007858.
57. van Middelaar T, van Vught LA, van Gool WA, et al. Blood pressure-lowering interventions to prevent dementia: a systematic review and meta-analysis. *Journal of hypertension*. 2018; 36: 1780-7.
58. Williamson JD, Pajewski NM, Auchus AP, et al. Effect of Intensive vs Standard Blood Pressure Control on Probable Dementia: A Randomized Clinical Trial. *Jama*. 2019; 32: 553-561.
59. Cicerone KD, Langenbahn DM, Braden C, et al. Evidence-based cognitive rehabilitation: updated review of the literature from 2003 through 2008. *Archives of physical medicine and rehabilitation*. 2011; 92: 519-30.
60. das Nair R, Cogger H, Worthington E and Lincoln NB. Cognitive rehabilitation for memory deficits after stroke. *The Cochrane database of systematic reviews*. 2016; 9: Cd002293.
61. Wentink MM, Berger MA, de Kloet AJ, et al. The effects of an 8-week computer-based brain training programme on cognitive functioning, QoL and self-efficacy after stroke. *Neuropsychological rehabilitation*. 2016; 26: 847-65.
62. Loetscher T and Lincoln NB. Cognitive rehabilitation for attention deficits following stroke. *The Cochrane database of systematic reviews*. 2013; 10.1002/14651858.CD002842.pub2: Cd002842.
63. Poulin V, Korner-Bitensky N, Dawson DR and Bherer L. Efficacy of executive function interventions after stroke: a systematic review. *Topics in stroke rehabilitation*. 2012; 19: 158-71.

64. Chung CS, Pollock A, Campbell T, Durward BR and Hagen S. Cognitive rehabilitation for executive dysfunction in adults with stroke or other adult non-progressive acquired brain damage. *The Cochrane database of systematic reviews*. 2013; 10.1002/14651858.CD008391.pub2: Cd008391.
65. Merriman NA, Sexton E, Donnelly NA, et al. Managing cognitive impairment following stroke: protocol for a systematic review of non-randomised controlled studies of psychological interventions. *BMJ open*. 2018; 8: e019001.
66. Oberlin LE, Waiwood AM, Cumming TB, Marsland AL, Bernhardt J and Erickson KI. Effects of Physical Activity on Poststroke Cognitive Function: A Meta-Analysis of Randomized Controlled Trials. *Stroke*. 2017; 48: 3093-100.
67. Cumming TB, Tyedin K, Churilov L, Morris ME and Bernhardt J. The effect of physical activity on cognitive function after stroke: a systematic review. *International psychogeriatrics*. 2012; 24: 557-67.
68. Yun GJ, Chun MH and Kim BR. The Effects of Transcranial Direct-Current Stimulation on Cognition in Stroke Patients. *Journal of stroke*. 2015; 17: 354-8.
69. Black S, Roman GC, Geldmacher DS, et al. Efficacy and tolerability of donepezil in vascular dementia: positive results of a 24-week, multicenter, international, randomized, placebo-controlled clinical trial. *Stroke*. 2003; 34: 2323-30.
70. Roman GC, Salloway S, Black SE, et al. Randomized, placebo-controlled, clinical trial of donepezil in vascular dementia: differential effects by hippocampal size. *Stroke*. 2010; 41: 1213-21.
71. Wilkinson D, Doody R, Helme R, et al. Donepezil in vascular dementia: a randomized, placebo-controlled study. *Neurology*. 2003; 61: 479-86.
72. Auchus AP, Brashear HR, Salloway S, Korczyn AD, De Deyn PP and Gassmann-Mayer C. Galantamine treatment of vascular dementia: a randomized trial. *Neurology*. 2007; 69: 448-58.
73. Erkinjuntti T, Kurz A, Gauthier S, Bullock R, Lilienfeld S and Damaraju CV. Efficacy of galantamine in probable vascular dementia and Alzheimer's disease combined with cerebrovascular disease: a randomised trial. *Lancet (London, England)*. 2002; 359: 1283-90.
74. Orgogozo JM, Rigaud AS, Stoffler A, Mobius HJ and Forette F. Efficacy and safety of memantine in patients with mild to moderate vascular dementia: a randomized, placebo-controlled trial (MMM 300). *Stroke*. 2002; 33: 1834-9.
75. Wilcock G, Mobius HJ and Stoffler A. A double-blind, placebo-controlled multicentre study of memantine in mild to moderate vascular dementia (MMM500). *International clinical psychopharmacology*. 2002; 17: 297-305.

76. Alvarez-Sabin J, Ortega G, Jacas C, et al. Long-term treatment with citicoline may improve poststroke vascular cognitive impairment. *Cerebrovascular diseases (Basel, Switzerland)*. 2013; 35: 146-54.
77. Narushima K, Paradiso S, Moser DJ, Jorge R and Robinson RG. Effect of antidepressant therapy on executive function after stroke. *The British journal of psychiatry : the journal of mental science*. 2007; 190: 260-5.
78. Jorge RE, Acion L, Moser D, Adams HP, Jr. and Robinson RG. Escitalopram and enhancement of cognitive recovery following stroke. *Archives of general psychiatry*. 2010; 67: 187-96.
79. Guekht A, Skoog I, Edmundson S, Zakharov V and Korczyn AD. ARTEMIDA Trial (A Randomized Trial of Efficacy, 12 Months International Double-Blind Actovegin): A Randomized Controlled Trial to Assess the Efficacy of Actovegin in Poststroke Cognitive Impairment. *Stroke*. 2017; 48: 1262-70.
80. Gorelick PB, Scuteri A, Black SE, et al. Vascular contributions to cognitive impairment and dementia: a statement for healthcare professionals from the american heart association/american stroke association. *Stroke*. 2011; 42: 2672-713.
81. Sachdev P, Kalaria R, O'Brien J, et al. Diagnostic criteria for vascular cognitive disorders: a VASCOG statement. *Alzheimer disease and associated disorders*. 2014; 28: 206-18.
82. Wein T, Lindsay MP, Cote R, Foley N, Berlingieri J, Bhogal S, et al. Canadian stroke best practice recommendations: Secondary prevention of stroke, sixth edition practice guidelines, update 2017. *International journal of stroke : official journal of the International Stroke Society*. 2018;13(4):420-43.
83. re3data.org: Health Canada Drug Product Database; editing status 2018-08-18; re3data.org - Registry of Research Data Repositories. <http://doi.org/10.17616/R3QJ7G> last accessed: 2019-03-12.
84. Ponchel A, Bombois S, Bordet R and Henon H. Factors Associated with Poststroke Fatigue: A Systematic Review. *Stroke research and treatment*. 2015; 2015: 347920.
85. Eilertsen G, Ormstad H and Kirkevold M. Experiences of poststroke fatigue: qualitative meta-synthesis. *Journal of advanced nursing*. 2013; 69: 514-25.
86. Duncan F, Wu S and Mead GE. Frequency and natural history of fatigue after stroke: a systematic review of longitudinal studies. *Journal of psychosomatic research*. 2012; 73: 18-27.
87. Wu S, Kutlubaev MA, Chun HY, et al. Interventions for post-stroke fatigue. *The Cochrane database of systematic reviews*. 2015; 10.1002/14651858.CD007030.pub3: Cd007030.
88. Bivard A, Lillcrap T, Krishnamurthy V, et al. MIDAS (Modafinil in Debilitating Fatigue After Stroke): A Randomized, Double-Blind, Placebo-Controlled, Cross-Over Trial. *Stroke*. 2017; 48: 1293-8.

89. Poulsen MB, Damgaard B, Zerahn B, Overgaard K and Rasmussen RS. Modafinil May Alleviate Poststroke Fatigue: A Randomized, Placebo-Controlled, Double-Blinded Trial. *Stroke*. 2015; 46: 3470-7.
90. Choi-Kwon S, Choi J, Kwon SU, Kang DW and Kim JS. Fluoxetine is not effective in the treatment of post-stroke fatigue: a double-blind, placebo-controlled study. *Cerebrovascular diseases (Basel, Switzerland)*. 2007; 23: 103-8.
91. Zedlitz AM, Rietveld TC, Geurts AC and Fasotti L. Cognitive and graded activity training can alleviate persistent fatigue after stroke: a randomized, controlled trial. *Stroke*. 2012; 43: 1046-51.
92. Johansson B, Bjuhr H and Ronnback L. Mindfulness-based stress reduction (MBSR) improves long-term mental fatigue after stroke or traumatic brain injury. *Brain injury*. 2012; 26: 1621-8.
93. McEvoy RD, Antic NA, Heeley E, et al. CPAP for Prevention of Cardiovascular Events in Obstructive Sleep Apnea. *The New England journal of medicine*. 2016; 375: 919-31.
94. Clarke A, Barker-Collo SL and Feigin VL. Poststroke fatigue: does group education make a difference? A randomized pilot trial. *Topics in stroke rehabilitation*. 2012; 19: 32-9.
95. Lorig KR, Ritter P, Stewart AL, et al. Chronic disease self-management program: 2-year health status and health care utilization outcomes. *Medical care*. 2001; 39: 1217-23.
96. Acciarresi M, Bogousslavsky J and Paciaroni M. Post-stroke fatigue: epidemiology, clinical characteristics and treatment. *European neurology*. 2014; 72: 255-61.
97. Staub F and Bogousslavsky J. Fatigue after stroke: a major but neglected issue. *Cerebrovascular diseases (Basel, Switzerland)*. 2001; 12: 75-81.
98. Annoni JM, Staub F, Bogousslavsky J and Brioschi A. Frequency, characterisation and therapies of fatigue after stroke. *Neurological sciences : official journal of the Italian Neurological Society and of the Italian Society of Clinical Neurophysiology*. 2008; 29 Suppl 2: S244-6.
99. Lerdal A, Bakken LN, Kouwenhoven SE, et al. Poststroke fatigue--a review. *Journal of pain and symptom management*. 2009; 38: 928-49.
100. Garland A, Jeon SH, Stepner M, et al. Effects of cardiovascular and cerebrovascular health events on work and earnings: a population-based retrospective cohort study. *CMAJ : Canadian Medical Association journal = journal de l'Association medicale canadienne*. 2019; 191: E3-e10.
101. Ngandu T, Lehtisalo J, Solomon A, et al. A 2 year multidomain intervention of diet, exercise, cognitive training, and vascular risk monitoring versus control to prevent cognitive decline in at-risk elderly people (FINGER): a randomised controlled trial. *Lancet (London, England)*. 2015; 385: 2255-63.
102. Andrieu S, Guyonnet S, Coley N, et al. Effect of long-term omega 3 polyunsaturated fatty acid supplementation with or without multidomain intervention on cognitive function in elderly adults

with memory complaints (MAPT): a randomised, placebo-controlled trial. *The Lancet Neurology*. 2017; 16: 377-89.

103. Moll van Charante EP, Richard E, Eurelings LS, et al. Effectiveness of a 6-year multidomain vascular care intervention to prevent dementia (preDIVA): a cluster-randomised controlled trial. *Lancet (London, England)*. 2016; 388: 797-805.
104. Martinez-Lapiscina EH, Clavero P, Toledo E, et al. Virgin olive oil supplementation and long-term cognition: the PREDIMED-NAVARRA randomized, trial. *The journal of nutrition, health & aging*. 2013; 17: 544-52.
105. Reis JP, Loria CM, Launer LJ, et al. Cardiovascular health through young adulthood and cognitive functioning in midlife. *Annals of neurology*. 2013; 73: 170-9.
106. Sevigny J, Chiao P, Bussiere T, et al. The antibody aducanumab reduces Abeta plaques in Alzheimer's disease. *Nature*. 2016; 537: 50-6.

**Tableau 1 : Sommaire des critères pour les niveaux de données probantes indiqués dans les *Recommandations canadiennes pour les pratiques optimales de soins de l'AVC* (édition de 2019)**

| Niveau de données probantes | Critères*                                                                                                                                                                                                                                                                                                                                                                                     |
|-----------------------------|-----------------------------------------------------------------------------------------------------------------------------------------------------------------------------------------------------------------------------------------------------------------------------------------------------------------------------------------------------------------------------------------------|
| <b>A</b>                    | Données probantes provenant d'une méta-analyse d'essais contrôlés randomisés ou résultats uniformes obtenus dans deux essais contrôlés randomisés ou plus. Les effets désirables l'emportent clairement sur les effets indésirables ou vice versa.                                                                                                                                            |
| <b>B</b>                    | Données probantes provenant d'un seul essai contrôlé randomisé, ou résultats uniformes obtenus dans au moins deux essais non randomisés ou non contrôlés, et grandes études observationnelles. Méta-analyse d'études non randomisées et/ou d'observation. Les effets désirables l'emportent sur les effets indésirables ou les deux types d'effet sont à peu près équivalents, ou vice versa. |
| <b>C</b>                    | Consensus du groupe de rédaction sur des thèmes soutenus par des données probantes de recherche limitées. Les effets désirables l'emportent sur les effets indésirables ou les deux types d'effet sont à peu près équivalents, ou vice versa, comme ils sont déterminés d'un commun accord par le groupe de rédaction.                                                                        |
| <b>Facteurs cliniques</b>   | Conseils pratiques raisonnables fournis par le consensus du groupe de rédaction sur des problèmes cliniques spécifiques courants et/ou controversés et pour lesquels les données de recherches demeurent insuffisantes pour guider la pratique.                                                                                                                                               |

\* Adapté de Guyatt, G. H., Cook, D. J., Jaeschke, R., et coll. *Grades of recommendation for antithrombotic agents: American College of Chest Physicians evidence-based clinical practice guidelines (8th edition)* [erratum publié dans Chest, 2008;134:473]. Chest, 2008; 133(6 Suppl.):123S–131S.
